1 **The MOM1 complex recruits the RdDM machinery via MORC6 to establish**  
2 ***de novo* DNA methylation.**

3

4 Zheng Li<sup>1,7</sup>, Ming Wang<sup>1,7</sup>, Zhenhui Zhong<sup>1,7</sup>, Javier Gallego-Bartolomé<sup>1,2</sup>, Suhua Feng<sup>1,3</sup>,  
5 Yasaman Jami-Alahmadi<sup>4</sup>, Xinyi Wang<sup>1</sup>, James Wohlschlegel<sup>4</sup>, Sylvain Bischof<sup>1,5</sup>, Jeffrey A.  
6 Long<sup>1</sup>, and Steven E. Jacobsen<sup>1,3,6\*</sup>

7 <sup>1</sup>Department of Molecular, Cell and Developmental Biology, University of California, Los Angeles, CA, USA.

8 <sup>2</sup>Present address: Instituto de Biología Molecular y Celular de Plantas (IBMCP), CSIC-Universitat Politècnica de  
9 València, 46022 Valencia, Spain.

10 <sup>3</sup>Eli & Edythe Broad Center of Regenerative Medicine & Stem Cell Research, University of California at Los  
11 Angeles, Los Angeles, CA, USA.

12 <sup>4</sup>Department of Biological Chemistry, University of California at Los Angeles, CA, USA.

13 <sup>5</sup>Present address: Department of Plant and Microbial Biology, University of Zurich, CH-8008 Zurich Switzerland.

14 <sup>6</sup>Howard Hughes Medical Institute, University of California, Los Angeles, CA, USA.

15 <sup>7</sup>These authors contributed equally

16 \* Correspondence: [jacobsen@ucla.edu](mailto:jacobsen@ucla.edu)

17

18

## 19 **Abstract**

20 MOM1 is an *Arabidopsis* factor previously shown to mediate transcriptional silencing  
21 independent of major DNA methylation changes. Here we found that MOM1 localizes with sites  
22 of RNA-directed DNA methylation (RdDM). Tethering MOM1 with artificial zinc finger to  
23 unmethylated *FWA* promoter led to establishment of DNA methylation and *FWA* silencing. This  
24 process was blocked by mutations in components of the Pol V arm of the RdDM machinery, as  
25 well as by mutation of *MORC6*. We found that at some endogenous RdDM sites, MOM1 is  
26 required to maintain DNA methylation and a closed chromatin state. In addition, efficient  
27 silencing of newly introduced *FWA* transgenes was impaired by mutation of MOM1 or mutation  
28 of genes encoding the MOM1 interacting PIAL1/2 proteins. In addition to RdDM sites, we  
29 identified a group of MOM1 peaks at active chromatin near genes that colocalized with MORC6.  
30 These findings demonstrate a multifaceted role of MOM1 in genome regulation.

31

32

## 33 **Introduction**

34 Transcriptional silencing is critical to keep transposable elements and DNA repeats under control  
35 in eukaryotic genomes. The process of transcriptional silencing involves several elaborate  
36 mechanisms involving many proteins as well as DNA methylation and histone modifications<sup>1,2</sup>.  
37 In *Arabidopsis*, the *MORPHEUS' MOLECULE1* (*MOM1*) gene, which was originally identified  
38 with the phenotype of reactivation of a DNA-methylated and silenced hygromycin-resistance  
39 transgene in the *mom1* mutant<sup>3</sup>, is a distinct component of the transcriptional silencing

40 machinery. In the *mom1* mutant, a set of transposable elements, mainly located in  
41 pericentromeric regions<sup>4-6</sup>, is robustly activated without major alteration in DNA methylation  
42 patterns<sup>5,7,8</sup>. In addition, no obvious visible decompaction of heterochromatin at chromocenters  
43 was observed in the *mom1* mutant<sup>9-11</sup>. The mechanism of MOM1 mediated silencing remains  
44 elusive.

45 *MOM1* encodes a large protein (2001 amino acids) with sequence homology to the  
46 ATPase domain of SWI2/SNF2 family proteins<sup>3</sup>. However, this SNF2 homology sequence is  
47 largely dispensable for MOM1's silencing function<sup>12</sup>. Instead, the Conserved MOM1 Motif 2  
48 (CMM2) domain, which is conserved among MOM1 orthologs, is required for the silencing  
49 function of MOM1<sup>12</sup>. The CMM2 domain of MOM1 multimerizes with itself and interacts with  
50 two PIAS (PROTEIN INHIBITOR OF ACTIVATED STAT)-type SUMO E3 ligase-like  
51 proteins, PIAL1 and PIAL2<sup>5,13</sup>. The *pial1 pial2* double mutant phenotype highly resembles the  
52 endogenous TE de-repression phenotype of *mom1*<sup>5</sup>, suggesting that the PIAL proteins and the  
53 MOM1 protein function in the same pathway. However, evidence suggests that the SUMO ligase  
54 activity is not required for the transcriptional silencing by PIAL2, and the interaction of MOM1  
55 and PIAL2 with SUMO is also not required for the silencing function of the MOM1 complex<sup>5,14</sup>.

56 RNA directed DNA Methylation (RdDM) is a plant specific pathway responsible for *de*  
57 *novo* DNA methylation<sup>15</sup>. It also assists in maintaining preexisting DNA methylation patterns  
58 together with other DNA methylation mechanisms<sup>16</sup>. The RdDM pathway can be divided into  
59 two arms. In the RNA POLYMERASE IV (Pol IV) arm of the RdDM pathway, SAWADEE  
60 homeodomain homolog 1 (SHH1) and CLASSY (CLSY) proteins recruit Pol IV to target sites  
61 marked by H3K9 methylation and unmethylated H3K4 to produce precursor single-stranded

62 RNA (ssRNA) of 30-45 nucleotides in length<sup>17-20</sup>. RNA-directed RNA polymerase 2 (RDR2)  
63 then converts these ssRNAs into double-stranded RNAs (dsRNA), which are then processed by  
64 Dicer-like 3 (DCL3) into 24nt siRNA<sup>21-24</sup>. 24nt siRNA are then loaded into ARGONAUTE  
65 proteins, AGO4, AGO6 or AGO9, which then participate in the RNA POLYMERASE V (Pol V)  
66 arm of the RdDM pathway<sup>17,25-27</sup>. The Pol V arm of the RdDM pathway is initiated by  
67 SU(VAR)3-9 homolog 2 (SUVH2) and SUVH9 binding to methylated DNA and recruiting the  
68 DDR complex composed of the DEFECTIVE IN RNA-DIRECTED DNA METHYLATION 1  
69 (DRD1), DEFECTIVE IN MERISTEM SILENCING3 (DMS3) and RNA-DIRECTED DNA  
70 METHYLATION1 (RDM1) proteins<sup>28-31</sup>. Subsequently, Pol V is recruited by the DDR complex  
71 and synthesizes non-coding RNAs which serve as scaffolds for the binding of AGO-siRNA  
72 duplexes<sup>18,32-34</sup>. The DNA methyltransferase enzyme DOMAINS REARRANGED  
73 METHYLTRANSFERASE 2 (DRM2) is then recruited to methylate target DNA<sup>35</sup>.

74 RNA-seq analysis shows that the majority of up-regulated genes and TEs in the *mom1*  
75 mutant and in the *nrpe1* mutant (mutant of the largest subunit of Pol V) do not overlap<sup>5,6</sup>. In  
76 addition, some genes are only significantly up-regulated in the *mom1 nrpe1* double mutant<sup>6</sup>, and  
77 a mutant allele of *nrpe1* was identified in a screen for enhancers of the de-repression of a  
78 transgenic luciferase reporter in the *mom1* background<sup>6</sup>. These studies suggest that, although  
79 MOM1 mediated transcriptional silencing and RdDM function as two different pathways, they  
80 also can act cooperatively to silence some endogenous and transgene targets.

81 The Arabidopsis Microorchidia (MORC) proteins were discovered as additional factors  
82 required for gene silencing downstream of DNA methylation<sup>36</sup>. In addition, MORCs associate  
83 with components of the RdDM pathway, are loaded onto sites of RdDM and are needed for the

84 efficiency of RdDM maintenance at some sites<sup>37-40</sup>. The connection between the RdDM pathway  
85 and the MORC proteins has also been demonstrated through experiments targeting the *FWA*  
86 gene. In wild type plants, *FWA* expression is silenced in all tissues except the endosperm due to  
87 DNA methylation in the promoter<sup>41</sup>. In the *fwa-4* epi-mutant (*fwa*), the *FWA* gene promoter is  
88 unmethylated leading to constitutive expression of the *FWA* gene and late flowering phenotype<sup>42</sup>.  
89 Tethering MORC proteins to the unmethylated promoter of the *FWA* gene in the *fwa* mutant via  
90 protein fusion to an artificial zinc finger protein 108 (ZF) led to efficient methylation of the  
91 promoter via recruitment of the RdDM machinery<sup>40,43</sup>. In addition, mutations in the MORC  
92 proteins impair the efficient *de novo* methylation and silencing of *FWA* transgenes<sup>40</sup>.

93         Several previous studies have identified functional similarities between MORC proteins  
94 and the MOM1 complex. Multiple screens using silenced transgene reporters have identified  
95 mutations in both *MOM1* and *MORC6*<sup>5,7</sup>, suggesting that they are both required for maintaining  
96 the silenced state of these transgenes. Analysis of gene expression defects in mutants has shown  
97 that a significant proportion of derepressed TEs in the *morc6* mutant were also derepressed in  
98 *mom1*, while another group of TEs are uniquely derepressed only in the *mom1 morc6* double  
99 mutant<sup>7</sup>. Thus, investigating the relationship between the RdDM machinery, MORC proteins and  
100 the MOM1 complex should help to understand the convergence and divergence in their  
101 functions.

102         In this study, by performing chromatin immunoprecipitation sequencing (ChIP-seq) of  
103 the MOM1 protein and MOM1 complex components, we observed strong colocalization with the  
104 MORC6 protein and RdDM sites. Tethering of MOM1 complex components to the *FWA*  
105 promoter in the *fwa* mutant by ZF fusion led to the establishment of DNA methylation and

106 silencing of the *FWA* gene. By transforming ZF fusions into mutants we discovered that the  
107 establishment of DNA methylation by ZF-MOM1 was not only blocked by the mutants of the  
108 downstream components of the Pol V arm of the RdDM pathway, but was also blocked in  
109 *morc6*. Furthermore, an interaction between PIAL2 and MORC6 was detected by a Yeast Two-  
110 Hybrid (Y2H) assay as well as co-immunoprecipitation (co-IP). In addition, efficient *de novo*  
111 methylation and silencing of an *FWA* transgene was impaired in the *mom1* and the *pial1/2*  
112 mutants. Consistent with the divergent function of the MOM1 complex and the RdDM pathway,  
113 the MOM1 complex was more enriched at TEs in pericentromeric region, while Pol V is more  
114 enriched at TEs in the chromosome arms. MOM1 also binds to a group of RdDM independent  
115 sites, at active and accessible chromatin. These results highlight new functions for MOM1 in  
116 genome regulation and help clarify the relationship between MOM1, MORCs and RdDM.

117

## 118 **Results**

### 119 **MOM1 complex colocalizes with RdDM sites**

120 Previously, it was shown that MOM1, PIAL1 and PIAL2 form a high molecular weight complex  
121 *in vivo*<sup>5</sup>. In addition, MOM1 Immunoprecipitation-Mass Spectrometry (IP-MS) pulled down  
122 other interactors such as AIPP3 and PHD1<sup>5</sup>. To comprehensively identify interacting  
123 components of the MOM1 complex, we repeated the IP-MS experiments of MOM1 protein with  
124 a 3X-FLAG epitope tag and observed that, consistent with previous reports, PIAL1, PIAL2,  
125 PHD1 and AIPP3 were pulled down (Fig. 1a and Supplementary Table 1). In addition, the  
126 MOM2 protein, which was predicted to be a non-functional homolog of MOM1, was identified

127 in the MOM1 IP-MS (Fig. 1a and Supplementary Table 1). Previous IP-MS of the AIPP3 protein  
128 pulled down other protein components such as PHD2 (also called PAIPP2), PHD3 (also called  
129 AIPP2) and CPL2, in addition to PHD1<sup>44-46</sup>. To facilitate the dissection of the interacting  
130 components, we performed IP-MS with FLAG tagged MOM2, PIAL2, PHD1 and AIPP3. AIPP3  
131 pulled down MOM1, MOM2, PIAL1, PIAL2, PHD1, as well as CPL2, PHD2 and PHD3 (Fig. 1a  
132 and Supplementary Table 1). However, MOM2, PIAL2 and PHD1 each pulled down each other,  
133 as well as the PIAL1 and MOM1 protein, but no peptides of CPL2, PHD2 and PHD3 (Fig. 1a  
134 and Supplementary Table 1). Thus, consistent with previous studies showing AIPP3 forms a  
135 complex with CPL2, PHD2 and PHD3<sup>44-46</sup>, AIPP3 appears to be a component of multiple protein  
136 complexes, one of which is the MOM1 protein complex.

137 To study the function of the MOM1 complex, ChIP-seq was performed in FLAG or  
138 MYC tagged MOM1, PIAL2, PHD1 and AIPP3 transgenic lines. Surprisingly, MOM1, PHD1,  
139 AIPP3, and PIAL2 were all highly colocalized with Pol V at RdDM sites (Fig. 1 b and c). To  
140 further validate colocalization of the MOM1 complex with the RdDM sites, we performed  
141 crosslinking IP-MS of FLAG tagged MOM1 and observed that in addition to the MOM1  
142 complex components, several proteins in the RdDM machinery, including NRPD2 (subunit of  
143 Pol-V and Pol-IV), NRPE1 (subunit of Pol-V), DMS3 and SPT5L (P=0.01243) were also  
144 significantly enriched (Fig. 1d and Supplementary Table 2). Interestingly, we also observed a  
145 significant enrichment of MORC1 and MORC6 in the MOM1 crosslinking IP-MS (Fig. 1d and  
146 Supplementary Table 2), suggesting that the RdDM machinery, the MORC proteins and the  
147 MOM1 complex are co-located at the same loci, either because they are crosslinked by co-bound

148 stretches of chromatin, or because the crosslinking process enhanced relatively weak interactions  
149 between the proteins.

150 Further examination of the MOM1 ChIP-seq signal over the AIPP3 peaks suggested that  
151 a group of AIPP3 binding loci were not enriched for MOM1 (Fig. 1e). We named the group of  
152 AIPP3 peaks that have MOM1 ChIP-seq signal enriched as Group 1 peaks and those with no  
153 MOM1 enrichment as Group 2 peaks. Consistent with our IP-MS data suggesting that PHD1 is a  
154 MOM1 complex component, PHD1 ChIP-seq signal was predominantly enriched in Group1  
155 AIPP3 peaks which also bound to MOM1 (Fig. 1e and Supplementary Fig1). We also performed  
156 Chip-seq with FLAG tagged PHD3 transgenic plants. In contrast to PHD1, PHD3 ChIP-seq  
157 signal was enriched in both groups of AIPP3 peaks, closely resembling the pattern of AIPP3  
158 ChIP-seq signal (Fig. 1e and Supplementary Fig1). These data further suggests that AIPP3 exists  
159 in multiple protein complexes including the MOM1 complex.

160

161 **Zinc finger tethering of MOM1 complex components to the *FWA* promoter triggers DNA**  
162 **methylation and silencing.**

163 Since MOM1 is localized to RdDM sites, and ZF fusions of RdDM components have been  
164 shown to silence *FWA* expression in the *fwa* mutant<sup>43</sup>, we investigated whether tethering the  
165 components of the MOM1 complex could also lead to the silencing of *FWA* expression. We  
166 created ZF fusion proteins with MOM1, MOM2, PIAL1, PIAL2, AIPP3 and PHD1 and  
167 transformed them into the *fwa* mutant. ZF fusion of MOM1, MOM2, PIAL1, PIAL2 and PHD1  
168 restored the early flowering phenotype (Fig. 2a, Supplementary Fig. 2a), significantly repressed



169 *FWA* expression (Fig. 2b), and induced DNA methylation at the *FWA* promoter region as  
170 detected by the bisulfite amplicon sequencing analysis (BS-PCR-seq) (Fig. 2c). The DNA  
171 methylation induced at the *FWA* promoter region was retained in the transgene-free T2 plants,  
172 showing that the newly established DNA methylation was heritable (Fig. 2c). PIAL1-ZF was  
173 somewhat less efficient at restoring the early flowering phenotype in the T1 population  
174 (Supplementary Fig.2a). However, reduced *FWA* mRNA levels and increased *FWA* promoter  
175 DNA methylation, as measured with McrBC digestion assay, were detected in some PIAL1-ZF  
176 T1 plants (Supplementary Fig. 2b), and plants with similar flowering time to the Col-0 were  
177 observed from the three T2 populations of the earliest flowering T1 plants (Fig. 2a,  
178 Supplementary Fig.2a). In addition, DNA methylation at the *FWA* promoter region retained in  
179 T2 plants free of PIAL1-ZF transgenes, showing that PIAL1-ZF can also induce heritable DNA  
180 methylation (Fig. 2c). AIPP3-ZF led to a slightly early flowering time in the T1 population  
181 compared to the *fwa* control population, however, zero T1 transgenic plants and very few T2  
182 plants flowered as early as the Col-0 control plants (Supplementary Fig 2a and c). A low level of  
183 DNA methylation in the *FWA* promoter region, mainly methylation in the CHH sequence  
184 context, was detected in the AIPP3-ZF T2 plants which were positive for the transgene  
185 (Supplementary Fig. 2d). However, no DNA methylation was detected in transgene-free T2  
186 plants segregating in the same T2 populations (Supplementary Fig. 2d). These data suggests that  
187 the establishment of DNA methylation by AIPP3-ZF is much weaker compared to other MOM1  
188 complex components. Previous work reported that, in addition to the designed binding site in the  
189 *FWA* promoter, ZF also binds to many off-target sites in the genome<sup>43</sup>. Whole genome bisulfite  
190 sequencing (WGBS) showed that MOM1-ZF, MOM2-ZF, PIAL1-ZF, PIAL2-ZF and PHD1-ZF

191 also enhanced DNA methylation at ZF off-target sites (Fig. 2d and Supplementary Fig. 3a).  
192 Overall, these results suggest that ZF fusions of the components of the MOM1 complex are able  
193 to trigger the establishment of DNA methylation and silence *FWA* expression in the *fwa* mutant,  
194 as well as establish methylation at other ZF off target sites.

195 The CMM2 domain has been shown to essential for the transcriptional gene silencing  
196 function of the MOM1 protein<sup>12,13</sup>. We found that a ZF fusion with the CMM2 domain together  
197 with a nuclear localization signal (called miniMOM1)<sup>12</sup> was efficient at targeting heritable *FWA*  
198 methylation (Supplementary Fig. 3b and c). We performed IP-MS with a miniMOM1-FLAG line  
199 and found peptides for MOM2, PIAL1, and PIAL2, but not for AIPP3 or PHD1 (Supplementary  
200 Table 1). These results suggest that AIPP3 and PHD1 may be dispensable for the targeting of  
201 methylation to *FWA* promoter.

202 To begin to dissect the requirements for MOM1-mediated establishment of *FWA*  
203 methylation and silencing, we first transformed MOM1-ZF and PHD1-ZF into *mom1 fwa* and  
204 *phd1 fwa* mutant backgrounds (Supplementary Fig. 4a). MOM1-ZF was able to trigger early  
205 flowering in *phd1 fwa*, positioning MOM1 downstream of PHD1 (Supplementary Fig. 4a).  
206 Consistent with this order of action, the *mom1* mutant blocked PHD1-ZF activity  
207 (Supplementary Fig. 4a). PHD1-ZF activity was also blocked in the *aipp3 fwa* mutant  
208 (Supplementary Fig. 4a). These results are consistent with IP-MS result showing that the  
209 MOM1-PHD1 interaction was abolished in the *aipp3-1* mutant (Supplementary Table 1).

210 To further dissect the hierarchy of action of MOM1 components, we transformed PIAL2-  
211 ZF into *aipp3 fwa*, *phd1 fwa*, *mom2 fwa* and *mom1 fwa* mutant backgrounds and found that

212 PIAL2-ZF triggered an early flowering phenotype in all mutant backgrounds (Supplementary  
213 Fig. 4b), suggesting that PIAL2 might act at the most downstream position within the MOM1  
214 complex. However, we also transformed MOM1-ZF into *aipp3 fwa*, *mom2 fwa* and *pial1/2 fwa*,  
215 and found that MOM1-ZF was also able to trigger early flowering in all these mutant  
216 backgrounds (Supplementary Fig. 4a), suggesting that MOM1 acts at a step parallel with  
217 PIAL1/2 in targeting DNA methylation. We did however observe that MOM1-ZF showed a  
218 lower efficiency of triggering early flowering in the *pial1/2 fwa* mutant compared to wild type or  
219 the other mutants (Supplementary Fig. 2a and 4a), suggesting that PIAL1/2 is required for the  
220 full functionality of MOM1-ZF. We also transformed MOM2-ZF into *aipp3 fwa*, *phd1 fwa*,  
221 *mom1 fwa*, and *pial1/2 fwa*, and like MOM1-ZF and PIAL2-ZF, MOM2-ZF was able to trigger  
222 early flowering in all the mutants (although again with lower efficiency in the *pial1/2 fwa*  
223 background) (Supplementary Fig. 4b), suggesting that MOM2 also acts with MOM1 and PIAL2  
224 in a very downstream step in triggering methylation, but that PIAL1/2 is required for its full  
225 functionality. As a control, we compared the flowering time in the mutant backgrounds without  
226 transgenes. *mom1 fwa* flowers at similar time compare to *fwa*, while *pial1/2 fwa* and *aipp3 fwa*  
227 flowered slightly earlier (Supplementary Fig. 4c), suggesting that the deficiency in triggering  
228 early flowering by ZF fusion proteins in these backgrounds is not due to differences in flowering  
229 time of mutant backgrounds. In summary, these results suggest that MOM1, PIAL1/PIAL2, and  
230 MOM2 are acting as the most downstream factors in the MOM1 complex for establishing DNA  
231 methylation at the *FWA* promoter.

232

233 **MOM1-ZF recruits the Pol V arm of the RdDM machinery via MORC6 to establish *de***  
234 ***nov* DNA methylation at the *FWA* promoter.**

235 Because the tethering of RdDM components to *FWA* has been previously shown to efficiently  
236 establish methylation of *FWA*<sup>28,43</sup>, we hypothesized that MOM1-ZF established *FWA* DNA  
237 methylation by recruiting the RdDM machinery. To test this hypothesis, we transformed PIAL2-  
238 ZF and MOM1-ZF into *fwa* backgrounds in which RdDM mutations had been introgressed,  
239 including *nprp1*, *suvh2/9*, *dms3*, *drd1*, *rdm1*, *nrpe1*, and *drm1/2*<sup>43</sup>. PIAL2-ZF and MOM1-ZF  
240 were still capable of triggering an early flowering phenotype in *nprp1* (the largest subunit of Pol  
241 IV), suggesting that siRNA biogenesis was not needed for methylation targeting (Fig. 3a). These  
242 fusions were also capable of triggering silencing in the *suvh2/9* mutant background (Fig. 3a),  
243 showing that the SUVH2 and SUVH9 factors that normally recruit the DDR complex and Pol V  
244 to chromatin were not needed for silencing. However, silencing activity of PIAL2-ZF and  
245 MOM1-ZF was blocked by DDR component mutations (*dms3*, *drd1*, and *rdm1*) as well as by  
246 mutations in the largest subunit of Pol V (*nrpe1*) and the DRM de novo methyltransferases  
247 (*drm1/2*) (Fig. 3a). These results place the action of PIAL2-ZF and MOM1-ZF upstream of the  
248 DDR complex. Interestingly, it was previously shown that MORC6-ZF showed an identical  
249 pattern of triggering *FWA* methylation in wild type, *nprp1*, and *suvh2/9*, but not in *dms3*, *drd1*,  
250 *rdm1*, *nrpe1*, or *drm1/2*<sup>43</sup>. This similarity prompted us to test the targeting of PIAL2-ZF, MOM1-  
251 ZF, MOM2-ZF, PIAL1-ZF and PHD1-ZF in the *morc6 fwa* genetic background. Interestingly,  
252 we found that all these ZF fusions failed to trigger *FWA* silencing in *morc6* (Fig. 3a and  
253 Supplementary Fig. 4d), suggesting that the MOM1 complex acts upstream of MORC6. To  
254 further confirm this order of action we transformed MORC6-ZF into *fwa* backgrounds in which

255 the *mom1-3*, *mom2-1*, *pial1/2*, *phd1-2* and *aipp3-1* mutants had been introgressed. We found that  
256 MORC6-ZF could successfully target silencing of *FWA* in all these backgrounds (Supplementary  
257 Fig. 4d), confirming that MORC6 acts downstream of the MOM1 complex in the targeting of  
258 *FWA* silencing. We also performed ChIP-seq of MYC-tagged MORC6 in the *morc6-3* mutant  
259 background. Similar to the MOM1 complex reported here, and similar to that previously reported  
260 for MORC4 and MORC7 proteins<sup>40</sup>, we observed that MORC6 was highly colocalized with Pol  
261 V at RdDM sites (Fig. 3b and c).

262           Given that PIAL1/PIAL2, MOM1, and MOM2 appeared to be the most downstream  
263 critical components of the MOM1 complex required for triggering *FWA* methylation, and that ZF  
264 fusions of these proteins failed to trigger methylation in a *morc6* mutant, we reasoned at least  
265 one of these components might physically interact with MORC6. Indeed, we found that PIAL2  
266 was able to interact with MORC6 in a Yeast Two-Hybrid assay (Fig. 3d). We also confirmed this  
267 interaction by an *in vivo* co-immunoprecipitation assay, observing that MORC6-FLAG was able  
268 to interact with PIAL2-Myc (Fig. 3e). While there could certainly be other important  
269 interactions, these results suggest that the MOM1 complex likely recruits MORC6 in part via a  
270 physical interaction between PIAL2 and MORC6. MORC6 then triggers *FWA* methylation via  
271 its interaction with the RdDM machinery as previously reported<sup>40</sup>.

272

### 273 **The MOM1 complex facilitates the process of transgene silencing**

274 Several previous screens identified MOM1 as a key component in the maintenance of the  
275 silenced state of the transgene reporters used in the screen<sup>3,5,47</sup>. RdDM is involved in the

276 maintenance of DNA methylation, but also in the initial establishment of methylation. For  
277 example, studies have shown that when an extra copy of the *FWA* gene is introduced into  
278 *Arabidopsis* plants via *Agrobacterium*-mediated transformation, it is very efficiently methylated  
279 and silenced in the wild type background. However, this methylation and silencing is blocked in  
280 RdDM mutants, leading to overexpression and a late flowering phenotype<sup>15,29,48</sup>. Interestingly,  
281 the silencing of *FWA* transgenes was previously shown to be less efficient in the *morc* mutants<sup>40</sup>.  
282 Since the MOM1 complex is closely linked with the RdDM machinery and MORC6, we  
283 suspected that the MOM1 complex may also facilitate the efficient establishment of transgene  
284 silencing. To test this, the *FWA* transgene was transformed into Col-0 plants (wild type) and the  
285 mutant background of *nrpe1-11*, *mom1-3*, *pial1/2*, *mom2-22*, *aipp3-1* and *phd1-2*. As expected<sup>40</sup>,  
286 the T1 transgenic plants in the *nrpe1-11* background flowered much later (mean leaf number:  
287 33.81) compared to those in the Col-0 background (mean leaf number: 15.91) (Fig. 4a and  
288 Supplementary Fig. 5a). We found that T1 plants containing the *FWA* transgene in *mom1-3* or  
289 *pial1/2* mutant backgrounds also flowered later than in those in the Col-0 background, with a  
290 mean leaf number of 27.55 (*mom1*) and 31.98 (*pial1/2*) (Fig. 4a and Supplementary Fig. 5a). We  
291 examined four late flowering T1 plants in each of the *mom1-3* and *pial1/2* mutant backgrounds  
292 and observed that, consistent with their late flowering phenotype, *FWA* mRNA levels were  
293 higher than in the Col-0 background (Fig. 4b upper panel). The unmethylated *FWA* promoter  
294 DNA fraction, as detected with McrBC digestion assay, was also higher in these T1 plants  
295 compared to Col-0, suggesting that efficient establishment of DNA methylation on the *FWA*  
296 transgene is impaired in *mom1-3* and *pial1/2* mutants (Fig. 4b lower panel).

297 Although a small number of T1 *FWA* transgenic plants with a late flowering time was also  
298 observed in the *mom2-2*, *aipp3-1* and *phd1-2* backgrounds, the average flowering time of these  
299 T1 plants was not significantly later than that of the T1 plants in the Col-0 background (Fig. 4a  
300 and Supplementary Fig. 5a). In fact, the *FWA* transgene T1 population in the *aipp3-1*  
301 background flowered significantly earlier than in Col-0 (Supplementary Fig. 5a), likely due to  
302 the fact that the *aipp3-1* mutant itself flowers earlier than Col-0 plants (Supplementary Fig. 5b),  
303 as previously reported<sup>46</sup>. These data suggests that MOM2, AIPP3 and PHD1 contribute  
304 minimally to efficient silencing of the *FWA* transgene, whereas MOM1 and PIAL1/2 contribute  
305 significantly.

306 In strong RdDM mutants such as *nrpe1*, the *FWA* transgene stays unmethylated and all of  
307 the T2 offspring plants with the *FWA* transgene show a late flowering phenotype<sup>40</sup>. We grew the  
308 T2 populations of four late flowering T1 plants in each of the *mom1-3* and *pial1/2* backgrounds  
309 and scored for their flowering time. In T2 plant populations in *mom1-3* line 2 and line 4, as well  
310 as in *pial1/2* line 3, all transgene positive plants showed a relatively early flowering time, similar  
311 to controls of T2 plants with *FWA* transgene in Col-0 background (Fig. 4c). However, in the  
312 other T2 populations tested, we observed transgene positive plants with flowering time spanning  
313 from very late to early (*mom1-3* T2 line 1 and line3, in *pial1/2* T2 line 1 and line 4), as well as  
314 one line with 100% late flowering plants (*FWA* transgene in *pial1/2* line 2) (Fig. 4c). These data  
315 suggests that instead of completely blocking *FWA* transgene silencing as in strong RdDM  
316 mutants like *nrpe1*, mutation of *MOM1* or *PIAL1/2* reduces the efficiency of *FWA* transgene  
317 silencing, similar to what was previously observed for mutation of *MORC* genes<sup>40</sup>.

318

319 **The MOM1 complex influences DNA methylation and chromatin accessibility at some**  
320 **endogenous RdDM sites.**

321 The strong co-localization of the MOM1 complex with RdDM sites suggests that the MOM1  
322 complex might facilitate the endogenous function of the RdDM machinery. To test this  
323 hypothesis, we performed Whole Genome Bisulfite Sequencing (WGBS) in *phd1-2*, *phd1-3*,  
324 *aipp3-1*, and *mom2-2* and analyzed these together with previously published WGBS data from  
325 the *morc6-3*<sup>24</sup>, *morc1/2/4/5/6/7* hextuple (*morchex*)<sup>39</sup>, *mom1-3* and *pial1/2* mutants<sup>5</sup>, followed by  
326 analysis using the High-Confidence Differentially Methylated Regions (hcDMRs) pipeline<sup>8</sup>. We  
327 observed a little over 200 hypo CHH hcDMRs in *mom1-3* and *pial1/2* double mutant and 23 hypo  
328 CHH hcDMRs in *mom2-2*, most of which overlapped with those of *morc6* and *morchex* at  
329 RdDM sites (520 DMRs in *morchex*)<sup>39</sup> (Figure 5a and 5b, Supplementary Table 3). This is  
330 consistent with an earlier analysis that showed a strong overlap of *mom1* hypomethylated DMRs  
331 with those of the *morchex* mutant<sup>8</sup>. On the other hand, the *aipp3-1* mutant only shared 1 out of its  
332 13 hypo CHH hcDMRs with *morc6* (Supplementary Table 3), and neither of the *phd1* mutant  
333 alleles tested showed any hypo CHH hcDMRs (Supplementary Table 3). To further explore the  
334 functions of MOM1 complex components at these sites, we performed RNA-seq in Col-0,  
335 *morc6-3*, *morchex*<sup>39</sup> and mutants of the MOM1 complex components. We observed that  
336 expression level of the genomic regions within 1 kb of the 520 CHH hypo-DMR regions  
337 previously found in the *morchex* mutant were slightly upregulated in *mom1-3*, *pial1/2*, *morc6-3*  
338 and *morchex* mutants, but not in *phd1-2*, *aipp3-1*, *pial1-2*, *pial2-1*, or *mom2-2* mutants (Figure  
339 5c), showing that MOM1/PIAL1/PIAL2, along with MORCs, are required for the maintenance



340 of CHH methylation and gene silencing at a small subset of RdDM sites, while AIPP3, PHD1,  
341 and MOM2 seem to play little role in this process.

342 We also performed ATAC-seq and detected 342 regions with increased ATAC-seq signal  
343 in the *mom1-3* mutant compared to Col-0 (Fig 5d). We also found that Pol V Chip-seq signal was  
344 highly enriched in these regions (Fig 5d and 5e), suggesting that the MOM1 complex reduces  
345 chromatin accessibility at a subset of RdDM sites. Together, these results suggest that the  
346 MOM1 complex contributes to the endogenous function of the RdDM machinery, facilitating the  
347 maintenance of DNA methylation and a more closed chromatin status at some RdDM sites.

348

### 349 **The MOM1 complex has endogenous function divergent from the RdDM machinery.**

350 Previous studies have shown that the *mom1* mutants show derepression of pericentromeric  
351 heterochromatin regions, while the targets of the RdDM machinery tends to locate in  
352 euchromatic regions of the chromosome arms<sup>5,6,49,50</sup>. Consistent with these differences, we  
353 observed that ChIP-seq signals of MOM1, MORCs, and to a lesser extent PIAL2 were more  
354 highly enriched on transposable elements (TEs) located in pericentromeric regions as compared  
355 to TEs located in the chromosome arms – the opposite pattern to that of Pol V ChIP-seq<sup>34</sup>  
356 (Figure 6a). From our RNA-seq, *mom1* and *pial1/2* mutants also showed transcriptional  
357 upregulation mainly in pericentromeric regions, while up-regulated TEs in the *nrpe1-11* mutant  
358 were located more broadly over the chromosomes including both pericentromeric regions and the  
359 euchromatic arms (Supplementary Fig 6a). Consistent with previous reports<sup>7</sup>, *morc6-3* and  
360 *morchex* mutants also displayed derepression of pericentromeric regions (Supplementary Fig 6a).

361 Upregulated differentially expressed TEs (DE-TEs) in the *morc6-3* and *morhex* mutants<sup>39</sup>  
362 showed a prominent overlap with those of the *mom1-2*, *mom1-3*, and *pial1/2* mutants  
363 (Supplementary Fig 6b). The *phd1*, *aipp3*, and *mom2* mutants on the other hand showed little  
364 change in expression at these same sites (Supplementary Fig 6a and 6b)., suggesting that these  
365 factors are less important for this silencing function.

366 We also discovered a set of MOM1 ChIP-seq peaks that did not overlap with DNA  
367 methylation. We initially discovered these by performing unsupervised clustering of MOM1  
368 ChIP-seq data with Pol V ChIP-seq data<sup>34</sup>, and identified a group of MOM1 unique peaks not  
369 colocalizing with Pol V sites (Fig 6b). We named the MOM1 and Pol V co-binding peaks as  
370 Cluster 1 peaks and the MOM1 unique peaks as Cluster 2 peaks (Fig 6b). Other components of  
371 the MOM1 complex, such as the PIAL2, AIPP3 and to a lesser extent, PHD1 were also enriched  
372 at cluster 2 peaks (Fig 6b). In addition, MORC4<sup>40</sup>, MORC6 and MORC7<sup>40</sup> co-localized with  
373 MOM1 at both the RdDM sites and the MOM1 unique Cluster 2 peaks (Fig 6b). Interestingly,  
374 we found that the Cluster 2 peaks were enriched for active histone marks H3K4me3 and  
375 H3PanAc<sup>51</sup>, as well as accessible chromatin indicated by ATAC-seq signal (Fig 6c). This  
376 observation is consistent with a recent study reporting that MORC7 protein binds to active  
377 chromatin regions devoid of RdDM<sup>40</sup>. While H3K4me3 tends to peak after the Transcription  
378 Start Site (TSS), the MOM1 ChIP-seq signal tended to peak around the TSS of the genes near  
379 Cluster 2 peaks, similar to the ATAC-seq signal (Fig 6d and 6e). The function of the MOM1  
380 complex at these non-DNA methylated sites is currently unknown.

381 Overall, the ChIP-seq data suggests that while MOM1 and PIAL2 show strong  
382 localization to RdDM sites, they and the MORC proteins are more enriched in pericentromeric

383 regions compared to the RdDM machinery. In addition, they are also present at unique active  
384 chromatin sites. The recruitment mechanism and the endogenous function of the MOM1  
385 complex binding at the active chromatin sites need to be further investigated.

386

## 387 **Discussion**

388 Due to the lack of major change in DNA methylation status in derepressed transgenes and  
389 endogenous TEs in the *mom1* mutant, MOM1 function has long been considered as independent  
390 of DNA methylation or downstream of DNA methylation. In our study, we observed a close link  
391 between the MOM1 complex and the RdDM machinery. By tethering the MOM1 complex with  
392 ZF in the *fwa* mutant, heritable DNA methylation was established at the *FWA* promoter,  
393 suggesting that the RdDM machinery was recruited as a result. Consistent with this, silencing  
394 and methylation of *FWA* were blocked in mutants of the DDR complex, as well as the *nrpe1* and  
395 *drm1/2* mutants, but not in the *svh2/9* and *nRPd1* mutants. Thus, the recruitment of the DRM2  
396 *de novo* DNA methyltransferase by the MOM1 complex requires the Pol V arm of the RdDM  
397 pathway. Previous MORC6-ZF tethering experiments resulted in similar results, *i.e.*, the DDR  
398 complex and the downstream Pol V arm was required for silencing of *FWA*. In addition, we  
399 found that mutation of *MORC6* blocked *FWA* silencing mediated by ZF fusion to MOM1  
400 complex components, suggesting that the MOM1 complex recruits the RdDM machinery via  
401 MORC6. This was also consistent with our observed physical interaction between PIAL2 of the  
402 MOM1 complex and MORC6. These observations do not however exclude the possibility that

403 physical interactions might also exist between MOM1 complex components and other  
404 components of the RdDM machinery.

405 We also found that MOM1 and PIAL1/2 are required for the efficiency of the  
406 establishment of methylation and silencing of *FWA* transgenes. Compared to RdDM mutants  
407 that completely block DNA methylation and silencing of *FWA* transgenes, the *mom1* and *pial1/2*  
408 mutants only showed a reduced efficiency of silencing, similar to what was observed in the  
409 *morchex* mutant. How the MOM1 complex performs this function is unclear. The MOM1  
410 complex might facilitate the initial loading of the RdDM machinery onto the *FWA* transgene, or  
411 it might allow for greater retention of the loaded RdDM machinery for more efficient DNA  
412 methylation and silencing, as has been suggested for the MORCs<sup>40</sup>. It is also possible that  
413 MOM1 complex mutants show defective transcriptional silencing of *FWA* during the DNA  
414 methylation establishment process, such that positive epigenetic marks associated with  
415 transcription may compete with the methylation establishment process, making it slower or less  
416 efficient. Consistent with the connections between MOM1 and RdDM revealed by ZF tethering  
417 results and *FWA* transgene silencing results, our ChIP-seq data showed that the MOM1 complex  
418 highly co-localized with RdDM sites in the genome. Our analysis of WGBS data also showed  
419 that *MOM1* and *PIAL1/2* were required to maintain CHH methylation at a small subset of RdDM  
420 sites, which significantly overlap with CHH hypoDMR sites in the *morchex* mutants. A previous  
421 study also reported a similar observation with WGBS data from a different *mom1* mutant allele  
422 (*mom1-2*)<sup>8</sup>. Thus, aside from the previous findings that that transgene and TE silencing are  
423 released in the *mom1* mutant background without major DNA methylation changes<sup>3,5,7</sup>, the  
424 MOM1 complex<sup>8</sup>, together with the MORC proteins, are also required for the maintenance of

425 DNA methylation at a small subset of RdDM sites. It seems likely that this would be  
426 mechanistically related to the role of both MOM1 and MORCs in the establishment of *FWA*  
427 transgene silencing, and it is intriguing to speculate that this might reflect an ancient role of these  
428 proteins in the initial establishment of methylation and silencing of novel invading transposable  
429 elements.

430 The role of MOM1 in establishment and maintenance of RdDM described in this study is  
431 clearly not the only role of MOM1 in epigenome regulation since comparison of DE-TEs and  
432 DE-genes in the *nrpe1* and *mom1* mutants in previous studies<sup>5,6</sup> indicates that the majority of  
433 their endogenous targets do not overlap. In addition, some genes are specifically upregulated in  
434 the *mom1 nrpe1* double mutant showing that MOM1 and RdDM clearly have some non-  
435 overlapping functions<sup>6</sup>. The localization of the MOM1 complex at RdDM sites might be needed  
436 for the repression of these common target sites upregulated in *mom1 nrpe1*. In addition, we  
437 observed that the MOM1 complex, as well as the MORC proteins, showed a stronger enrichment  
438 over TEs in the pericentromeric region, a pattern that is the opposite of Pol V, which shows  
439 stronger enrichment over TEs in the euchromatic arms. Thus, although the MOM1 complex and  
440 MORC proteins broadly co-localizes with most RdDM sites, they have different binding profiles  
441 compared to the core RdDM component Pol V.

442 In addition to the localization at RdDM sites, we identified a unique set of MOM1 peaks  
443 which are enriched with active chromatin marks. This is reminiscent of an earlier study reporting  
444 that MOM1 regulates transcription in intermediate heterochromatin, which is associated with  
445 both active and repressive histone marks<sup>49</sup>. Interestingly, the MOM1 complex and MORCs seem  
446 to behave similarly in binding active chromatin, as MORC7 was also reported to bind active

447 chromatin devoid of RdDM<sup>52</sup>, and MORCs are colocalized at these MOM1 unique peaks. The  
448 mechanism of recruiting the MOM1 complex to these unique peaks and the function of MOM1  
449 at these active chromatin sites is unknown.

450 In summary, our results uncover a new function for the MOM1 complex in the efficiency  
451 of both the establishment and maintenance of RNA-directed DNA methylation and gene  
452 silencing, and point to a potential function at some unmethylated euchromatic regions,  
453 suggesting that MOM1 plays multifaceted roles in epigenome regulation.

454

## 455 **Materials and Methods**

### 456 **Growth condition, molecular cloning and plant materials**

457 *Arabidopsis thaliana* plants in this study were Col-0 ecotype and were grown under 16h light: 8h  
458 dark condition. The T-DNA insertion lines used in this study are: *aipp3-1* (GABI\_058D11),  
459 *aipp3-2* (SAIL\_1246\_E10), *mom1-2* (SAIL\_610\_G01), *mom1-3* (SALK\_141293), *mom1-7*  
460 (GABI\_815G11), *mom2-1* (WiscDsLox364H07), *mom2-2* (SAIL\_548\_H02), *pial1-2*  
461 (CS358389), *pial2-1* (SALK\_043892), *morc6-3* (GABI\_599B06), *aipp2-1* (SALK\_057771),  
462 *nrpe1-11* (SALK\_029919) and *morchex*<sup>39</sup> consisting of *morc1-2* (SAIL\_893\_B06), *morc2-1*  
463 (SALK\_072774C), *morc4-1* (GK-249F08), *morc5-1* (SALK\_049050C), *morc6-3*  
464 (GABI\_599B06), and *morc7-1* (SALK\_051729). In addition to the T-DNA insertion line, three  
465 *phd1* mutant alleles were generated using a YAO promoter driven CRISPR/Cas9 system<sup>53</sup>. *phd1-*  
466 *2* contained a single nucleotide T insertion and *phd1-3* contained a 13-nucleotide deletion and an  
467 18-nucleotide duplication in the 2<sup>nd</sup> exon of PHD1 gene, both of which led to early termination  
468 of the protein at amino acid 53 located within the PHD domain. *phd1-4* contained a single  
469 nucleotide T insertion in the 3<sup>rd</sup> exon of the PHD1 gene, leading to early termination of the  
470 PHD1 protein at amino acid 88. The *fwa* background RdDM mutants, including *nrpd1-4*  
471 (SALK\_083051), *svvh2* (SALK\_079574) *svvh9* (SALK\_048033), *morc6-3* (GABI\_599B06),

472 *rdm1-4* (EMS)<sup>54</sup>, *drd1-6* (EMS)<sup>55</sup>, *dms3-4* (SALK\_125019C), *nrpe1-1* (EMS), and *drm1-2*  
473 (SALK\_031705) *drm2-2* (SALK\_150863) were previously described<sup>43</sup>. The other *fwa*  
474 background mutants in MOM1 complex were *phd1-2*, *aipp3-1* (GABI\_058D11), *mom1-3*  
475 (SALK\_141293), *mom2-1* (WiscDsLox364H07), and *pial1* (CS358389) *pial2* (SALK\_043892),  
476 which were generated by crossing *fwa-4* to corresponding mutants. F2 offspring plants with late  
477 flowering phenotype were genotyped for homozygous T-DNA mutant alleles, and propagated to  
478 F3 generation. Then, F3 populations were screened for non-segregating homogenous late  
479 flowering phenotype. For IP-MS comparisons of MOM1-FLAG in *mom1-7* mutant background,  
480 to that in the backgrounds of *aipp3-1*, *mom2-2*, as well as *aipp3/mom2-2* double mutants,  
481 MOM1-FLAG transgenic lines were constructed by recombineering 2xYpet-3xFLAG encoding  
482 DNA sequence in frame with the C terminus of MOM1 gene, in a transformation-competent  
483 artificial chromosome clone (JAtY68M20 (68082 bp)) using a bacterial recombineering  
484 approach<sup>56</sup> and transformed into *mom1-7* mutants. Then this MOM1-FLAG transgenic line was  
485 crossed into *aipp3-1*, *mom2-2*, as well as *aipp3/mom2-2* double mutant backgrounds. For  
486 transgenic plants of FLAG epitope tagged, MYC epitope tagged and ZF tagged proteins used in  
487 all other IP-MS, ChIP-seq and ZF tethering experiments, genomic DNA fragments including the  
488 promoter region were amplified and cloned into entry vectors (pENTR-D or PCR8 from  
489 Invitrogen) and cloned into destination vectors with C-terminal 3xFLAG  
490 (pEG302\_GW\_3xFLAG), MYC (pEG302\_GW\_9xMYC) and ZF108  
491 (pEG302\_GW\_3xFLAG\_ZF108) by LR clonase II (Invitrogen). Primers used in this study were  
492 listed in Supplementary Table 4. Agrobacterium mediated floral dipping (strain Ag10) were used  
493 to generate transgenic plants in corresponding loss-of-function mutant backgrounds or specific  
494 mutant backgrounds as indicated.

#### 495 **IP-MS and cross-linking IP-MS**

496 Native IP-MS and cross-linking IP-MS were performed following a method described in a recent  
497 paper with modifications<sup>40</sup>. 50 ml of liquid nitrogen flash-frozen unopened flower buds from  
498 FLAG epitope tagged transgenic plants were used for each IP-MS experiment and flower buds of  
499 Col-0 plants were used as control. Flower tissue were ground to fine powder in liquid nitrogen  
500 with Retsch homogenizer. For Native IP-MS, tissue powder was resuspended in 25 ml IP buffer

501 (50 mM Tris-HCl pH 8.0, 150 mM NaCl, 5 mM EDTA, 10% glycerol, 0.1% Tergitol, 0.5 mM  
502 DTT, 1 mg/ml Pepstatin A, 1 mM PMSF, 50  $\mu$ M MG132 and cOmplete EDTA-free Protease  
503 Inhibitor Cocktail (Roche)) and further homogenized with dounce homogenizer. The lysates  
504 were filtered with Miracloth and centrifuged at 20,000 g for 10 min at 4 °C. The supernatant was  
505 incubated with 250  $\mu$ L anti-FLAG M2 magnetic beads (Sigma) at 4 °C for 2 hours with constant  
506 rotation. The magnetic beads were washed with IP buffer and eluted with 250  $\mu$ g/ml 3xFLAG  
507 peptides. Eluted proteins were used for Trichloroacetic acid (TCA) precipitation and mass  
508 spectrometric analysis.

509 For Crosslinking IP-MS, flower tissue powder was resuspended in 40 ml nuclei  
510 extraction buffer<sup>40</sup> with 1.5 mM EGS (Ethylene Glyco-bis (succinimidylsuccinate)) and rotated  
511 at room temperature for 10 min. Then the lysate was supplemented with formaldehyde at 1%  
512 final concentration and rotated at room temperature for another 10 min followed by adding  
513 glycine to stop crosslinking. The crosslinked lysate was filtered through Miracloth and  
514 centrifuged for 20 min at 2880 g. The pellet (which contains the nuclei) was resuspended in 3 ml  
515 of extraction buffer 2 (0.25 M sucrose, 10 mM Tris-HCl pH 8.0, 10 mM MgCl<sub>2</sub>, 1% Triton X-  
516 100, 5 mM 2-Mercaptoethanol, 0.1 mM PMSF, 5mM Benzamidine and cOmplete EDTA-free  
517 Protease Inhibitor Cocktail (Roche)), then centrifuged at 12,000 g for 10 min at 4 °C. Then, the  
518 pellet was carefully resuspended in 1.2ml nuclear lysis buffer (50 mM Tris-HCl pH 8.0, 10 mM  
519 EDTA, 1% SDS, 0.1 mM PMSF, 5 mM Benzamidine and cOmplete EDTA-free Protease  
520 Inhibitor Cocktail (Roche)) and incubated on ice for 10 min. After that, 5.1 ml dilution buffer  
521 (1.1% Triton x-100, 1.2 mM EDTA, 16.7 mM Tris-HCl pH 8.0, 167 mM NaCl, 1 mM PMSF, 5  
522 mM Benzamidine and cOmplete EDTA-free Protease Inhibitor Cocktail (Roche)) was added and  
523 mixed by pipetting. Resuspended nuclei were split into 3x 2.1ml aliquots for sonication of 22  
524 min (30 s on/30s off) with Bioruptor Plus (Diagenode). Sheared lysate from the same sample was  
525 combined and centrifuged at 12,000 g for 10 min at 4 °C. Another 6 ml of dilution buffer and  
526 250  $\mu$ L anti-FLAG M2 magnetic beads (Sigma) were added to the supernatant and the sample  
527 was incubated at 4 °C for 2 hours with constant rotation. Then, the magnetic beads were washed  
528 and eluted with 250  $\mu$ g/ml 2xFLAG peptides. Eluted protein was used for Trichloroacetic acid  
529 (TCA) precipitation and mass spectrometric analysis.



530 The mass spectrometry procedure were performed as previously reported<sup>40</sup>. MS/MS  
531 database searching was performed using MaxQuant (1.6.10.43) against newest *Arabidopsis*  
532 *thaliana* proteome database from <http://www.uniprot.org>. Analysis of raw data was obtained  
533 from the LC–MS runs using MaxQuant with the integrated Andromeda peptide search engine  
534 using default setting with enabled LFQ normalization. Data sets were filtered at a 1% FDR at  
535 both the PSM and protein levels. The MaxQuant peptide intensity and MS/MS counts were used  
536 for all peptide quantitation. For Fig. 1d, fold of change of MS/MS counts and P value of MOM1-  
537 FLAG lines crosslinking IP-MS compared to crosslinking IP-MS of Col-0 control were  
538 calculated by LIMMA<sup>57</sup>.

### 539 **Chromatin immunoprecipitation sequencing (ChIP-seq)**

540 We followed previous protocol<sup>28,40</sup> for ChIP-seq with some modifications. Briefly, 15 ml of  
541 unopened flower buds were collected for each ChIP and flash-frozen in liquid nitrogen. The flower  
542 tissue was ground to fine powder with Retsch homogenizer in liquid nitrogen and resuspended in  
543 nuclei extraction buffer (50 mM HEPES pH 8.0, 1 M sucrose, 5 mM KCl, 5 mM MgCl<sub>2</sub>, 0.6%  
544 Triton X-100, 0.4 mM PMSF, 5 mM benzamidine, cOmplete EDTA-free Protease Inhibitor  
545 Cocktail (Roche), 50uM MG132). For transgenic lines of MOM1-MYC in *mom1-7* and PIAL2-  
546 MYC in *pial2-1*, EGS was first added to resuspended lysate to 1.5 mM and the tissue lysate was  
547 incubated at room temperature for 10 min with rotation. Then the lysate was supplemented with  
548 formaldehyde at 1% and rotated at room temperature for another 10 min followed by adding  
549 glycine to stop crosslinking. For ChIP of all other proteins, crosslinking was performed by directly  
550 supplementing formaldehyde to 1% without adding EGS, then rotated at room temperature for 10  
551 min followed by adding glycine to stop crosslinking. The crosslinked nuclei were isolated, lysed  
552 with Nuclei Lysis Buffer and diluted with ChIP Dilution Buffer as previously described<sup>40</sup>. Then  
553 the lysate was sonicated for 22 min (30 s on/30s off) with Bioruptor Plus (Diagenode). After  
554 centrifugation, antibody for FLAG epitope (M2 monoclonal antibody, Sigma F1804, 10 ul per  
555 ChIP) or for MYC epitope (Cell Signaling, 71D10, 20 ul per ChIP) were added to the supernatant  
556 and incubated at 4 °C overnight with rotation. Then, Protein A and Protein G Dynabeads  
557 (Invitrogen) were added and incubated at 4 °C for 2 hours with rotation. After that, as previously  
558 described<sup>40</sup>, the beads were washed and eluted, and the eluted chromatin was reverse-crosslinked

559 by adding 20 ul 5 M NaCl and incubated at 65 °C overnight followed by treatment of Proteinase  
560 K (Invitrogen) for 4 hours at 45 °C. DNA was purified and precipitated with 3 M Sodium Acetate,  
561 GlycoBlue (Invitrogen) and ethanol at -20 °C overnight. After centrifugation, the precipitated  
562 DNA was washed with ice cold 70% ethanol, air dried and dissolved in 120 ul of H<sub>2</sub>O. ChIP-seq  
563 libraries were prepared with Ovation Ultra Low System V2 kit (NuGEN), and sequenced on  
564 Illumina NovaSeq 6000 or HiSeq 4000 instruments.

565 For ChIP-seq analysis, raw reads were trimmed using trim\_galore  
566 ([https://www.bioinformatics.babraham.ac.uk/projects/trim\\_galore/](https://www.bioinformatics.babraham.ac.uk/projects/trim_galore/)) and aligned to the TAIR10  
567 reference genome with bowtie2 (v2.4.2)<sup>58</sup> allowing zero mismatch and reporting one valid  
568 alignment for each read. The Samtools (v1.15)<sup>59</sup> were used to convert sam files to bam files, sort  
569 bam files and remove duplicate reads. Track files in bigWig format were generated using  
570 bamCoverage of deeptools (v3.5.1)<sup>60</sup> with RPKM normalization. Peaks were called with MACS2  
571 (v2.1.2)<sup>61</sup> and peaks frequently identified in previous ChIP-seq of Col-0 plant with M2 antibody  
572 for FLAG epitope were removed from analysis.

573 For unsupervised clustering of Pol V and MOM1 peaks (Fig. 6b), RPKM of Pol V<sup>34</sup>, MOM1 and  
574 corresponding control ChIP-seqs over merged peaks of Pol V and MOM1 were calculated with  
575 custom scripts. Then,  $\log_2(\text{PolV RPKM}/\text{control RPKM})$  and  $\log_2(\text{MOM1 RPKM}/\text{control RPKM})$   
576 were calculated and used for unsupervised clustering with the ConsensusClusterPlus R package  
577 (v1.60.0)<sup>62</sup>. For analysis of ChIP signal over TEs located in euchromatic arms versus TEs located  
578 in pericentromeric regions (Fig. 6a), the pericentromeric regions were as previously defined<sup>63</sup>.

579

## 580 **RNA sequencing**

581 For RNA-seq experiments, twelve-day old seedlings grown on half MS medium (Murashige and  
582 Skoog Basal Medium) were collected and flash-frozen in liquid nitrogen. RNA was extracted  
583 with Direct-zol RNA MiniPrep kit (Zymo Research) and 1ug of total RNA was used to prepare  
584 RNA-seq libraries with TruSeq Stranded mRNA kit (Illumina), and the libraries were sequenced  
585 on Illumina NovaSeq 6000 instruments.

586 The raw reads of RNA-seq were aligned to the TAIR10 reference genome with bowtie2. Rsem-  
587 calculate-expression from RSEM<sup>64</sup> with default settings was used to calculate expression levels.

588 DEGs and DE-TEs were calculated with run\_DE\_analysis.pl from Trinity version 2.8.5<sup>65</sup> and  
589  $\log_2$  FC  $\geq$  1 and FDR  $<$  0.05 were used as the cut off. RNA-seq track files in bigWig format  
590 were generated using bamCoverage of deeptools (v3.1.3) with RPKM normalization.

### 591 **Whole Genome Bisulfite Sequencing**

592 Rosette leaves of about one-month-old *Arabidopsis* Col-0 wild type, *phd1-2*, *phd1-3*, *mom2-2*,  
593 *aipp3-1*, *fwa* plants and ZF transgenic lines (MOM1-ZF, MOM2-ZF, PIAL1-ZF, PIAL2-ZF and  
594 PHD1-ZF) T2 plants with early flowering phenotype were collected for DNA extraction using  
595 DNeasy Plant Mini Kit (QIAGEN). 500 ng DNA was sheared with Covaris S2 (Covaris) into  
596 around 200bp at 4°C. The DNA fragments were used to perform end repair reaction using the  
597 Kapa Hyper Prep kit (Roche), and together with Illumina TruSeq DNA sgl Index Set A/B  
598 (Illumina) to perform adapter ligation. The ligation products were purified with AMPure beads  
599 (Beckman Coulter), and then converted with EpiTect Bisulfite kit (QIAGEN). The converted  
600 ligation products were used as templates, together with the primers from the Kapa Hyper Prep kit  
601 (Roche) and MyTaq Master mix (Bioline) to perform PCR. The PCR products were purified with  
602 AMPure beads (Beckman Coulter) and sequenced by Illumina NovaSeq 6000 instrument.

603 The WGBS data analysis has been was performed as previously described<sup>43</sup> with minor  
604 modifications. The WGBS raw reads were aligned to both strands of the TAIR10 reference genome  
605 using BSMAP (v.2.74)<sup>66</sup>, allowing up to 2 mismatches and 1 best hit. Reads with more than 3  
606 consecutives methylated CHH sites were removed, and the methylation level was calculated with  
607 the ratio of C/(C+T). For Fig. 2d, the methylation levels at 1kb flanking regions of ZF off target  
608 sites<sup>43</sup> in MOM1-ZF, MOM2-ZF, PIAL1-ZF, PIAL2-ZF and PHD1-ZF were subtracted by the  
609 methylation level of *fwa* and plotted with R package pheatmap.

610 For Fig. 5a, the hcDMRs ( $p < 0.01$ ,  $> 33$  supported controls) of Col-0 wild type, *aipp3-1*, *phd1-*  
611 *2*, *mom1-2*, *mom2-1*, *pial1* *pial2*, *morc6*, and *morhex* mutants were called using a previous  
612 method<sup>8</sup>, which were then used to generate the heat map using R package pheatmap [R. Kolde,  
613 Pheatmap: pretty heatmaps]. For Fig. 5b, Overlap Enrichment was calculated by using HOMER<sup>67</sup>  
614 mergePeaks to identify overlapped CHH hcDMR regions and followed by normalization with  
615 genome size and over random shuffles.

## 616 **BS-PCR-seq**

617 Rosette leaves of about one-month-old plants were collected and subject to DNA extraction with  
618 CTAB method followed by bisulfite DNA conversion using the EpiTect Bisulfite kit (QIAGEN)  
619 kit. Three regions of the *FWA* gene were amplified from the converted DNA with Pfu Turbo Cx  
620 (Agilent): Region 1 (chr4: 13038143-13038272), Region 2 (chr4: 13038356- 13038499) and  
621 Region3 (chr4: 13038568-13038695). Primers used are listed in Supplementary Table 4. Libraries  
622 were prepared with the purified PCR product by the Kapa DNA Hyper Kit (Roche) together with  
623 TruSeq DNA UD indexes for Illumina (Illumina) and were sequenced on Illumina iSeq 100 or  
624 HiSeq 4000 instruments.

625 BS-PCR-seq data was analyzed as previously described<sup>43</sup>. Briefly, raw reads were aligned  
626 to both strands of the TAIR10 reference genome with BSMAP (v.2.90)<sup>66</sup> allowing up to 2  
627 mismatches and 1 best hit. After quality filtering, the methylation level of cytosines was calculated  
628 as the ratio of C/(C+T), and customized R scripts were used to plot methylation data over the *FWA*  
629 region 1-3.

## 630 **ATAC-seq**

631 Fresh unopened flower buds of about one-month-old Col-0 and *mom1-3* mutant plants were  
632 collected for nuclei extraction and ATAC-seq, with two replicates for each genotype. The nuclei  
633 collection process from unopened flower buds is as described previously<sup>34</sup>. Freshly isolated  
634 nuclei were used for ATAC-seq as described elsewhere<sup>68</sup>. Unopened flower buds were collected  
635 for extraction of nuclei as follows. About 5 grams of unopened flower buds was collected and  
636 immediately transferred into ice-cold grinding buffer (300 mM sucrose, 20 mM Tris pH 8, 5 mM  
637 MgCl<sub>2</sub>, 5 mM KCl, 0.2% Triton X-100, 5 mM β-mercaptoethanol, and 35% glycerol). The  
638 samples were ground with Omni International General Laboratory Homogenizer on ice and then  
639 filtered through a two-layer Miracloth and a 40-μm nylon mesh Cell Strainer (Fisher). Samples  
640 were spin filtered for 10 min at 3,000 g, the supernatant was discarded, and the pellet was  
641 resuspended with 25 ml of grinding buffer using a Dounce homogenizer. The wash step was  
642 performed twice in total, and nuclei were resuspended in 0.5 ml of freezing buffer (50 mM Tris  
643 pH 8, 5 mM MgCl<sub>2</sub>, 20% glycerol, and 5 mM β-mercaptoethanol). Nuclei were subjected to a

644 transposition reaction with Tn5 (Illumina). For the transposition reaction, 25  $\mu$ l of 2x DMF (66  
645 mM Tris-acetate pH 7.8, 132 mM K-Acetate, 20 mM Mg-Acetate, and 32% DMF) was mixed  
646 with 2.5  $\mu$ l Tn5 and 22.5  $\mu$ l nuclei suspension at 37°C for 30 min. Transposed DNA fragments  
647 were purified with ChIP DNA Clean & Concentrator Kit (Zymo). Libraries were prepared with  
648 Phusion High-Fidelity DNA Polymerase (NEB) in a system containing 12.5  $\mu$ l 2x Phusion, 1.25  
649  $\mu$ l 10 mM Ad1 primer, 1.25  $\mu$ l 10 mM Ad2 primer, 4  $\mu$ l ddH<sub>2</sub>O, and 6  $\mu$ l purified transposed  
650 DNA fragments. The ATAC-seq libraries were sequenced on HiSeq 4000 platform (Illumina).  
651 ATAC-seq data analysis was also performed as previously described<sup>69</sup>. Briefly, raw reads were  
652 adaptor-trimmed with trim\_galore and mapped to the TAIR10 reference genome with Bowtie2<sup>58</sup>  
653 (-X 2000 -m 1). After removing duplicate reads and reads mapped to chloroplast and  
654 mitochondrial, ATAC-Seq open chromatin peaks of each replicate were called using MACS2  
655 with parameters -p 0.01 --nomodel --shift -100 --extsize 200. Consensus peaks between  
656 replicates were identified with bedtools (version 2.26.0) intersect and differential accessible  
657 peaks were called with the R package edgeR<sup>70</sup> (version 3.30.0). Merged bigwig file of the two  
658 replicates were used for heatmap and metaplot.

### 659 **RT-qPCR**

660 Rossette leaves of about one-month-old plants were collected for RNA extraction with Zymo  
661 Direct-Zol RNA miniprep Kit (Zymo Research). 1  $\mu$ g of RNA were used for cDNA synthesis  
662 with iScript cDNA Synthesis Kit (Bio-Rad). qPCR was performed with iQ SYBR Green  
663 Supermix (Bio-Rad) and primers for qPCR were listed in Supplementary Table 4.

### 664 **McrBC assay**

665 Genomic DNA extracted with the CTAB method were treated with RNase A (Qiagen) and  
666 diluted to about 100 ng/ $\mu$ l. 10  $\mu$ l of diluted DNA were used for McrBC digestion (NEB, 4 h at  
667 37 °C) or mock digestion (the same volume of H<sub>2</sub>O instead of McrBC enzyme was added with  
668 all other components the same in the reaction, was also kept for 4 h at 37 °C). Relative  
669 undigested *FWA* promoter quantity (McrBC treated / H<sub>2</sub>O treated) was determined with qPCR  
670 and primers used were listed in Supplementary Table 4.

671 **Flowering time measurement**

672 Total true leaf numbers (sum of rosette leaf number and cauline leaf number) after bolting of the  
673 plants were used as measurement of flowering time. Plants with less than 20 true leaf number  
674 were considered as early flowering. The numbers of independent plants (n) scored for each  
675 population are listed in Supplementary Table 5.

676 **Yeast two-hybrid (Y2H)**

677 The cDNA sequences of PIAL1, PIAL2, MOM2, MORC6, and MOM1 CMM2 domain (aa1660-  
678 aa1860)<sup>5</sup> were first cloned into gateway entry vectors followed by LR reaction with pGBKT7-GW  
679 (Addgene 61703) and pGADT7-GW (Addgene 61702) destination vectors. Pairs of plasmid DNA  
680 for the desired protein interaction to be tested were co-transformed into the yeast strain AH109.  
681 Combinations of the empty pGBKT7-GW or pGADT7-GW vectors and the plasmids of desired  
682 proteins were used for transformation of yeast cells to test for self-activation. Transformed yeast  
683 cells were plated on synthetic dropout medium without Trp and Leu (SD-TL) and incubated for 2-  
684 3 days to allow for the growth of positive colonies carrying both plasmids. Three yeast colonies of  
685 each tested protein interaction pairs were picked and mixed in 150µl 1xTE solution, and 3µl of the  
686 1xTE solution with the yeast cells were blotted on synthetic dropout medium without Trp, Leu,  
687 and His (SD-TLH) and with 5mM 3-amino-1,2,4-triazole (3AT) to inhibit background growth.  
688 Growth of yeast on SD-TLH with 5mM 3AT medium after 2-3 days of incubation indicates the  
689 interaction between the GAL4-AD fusion protein and the GAL4-BD fusion protein.

690 **Co-immunoprecipitation**

691 The Co-immunoprecipitation experiment was performed following previous protocol with some  
692 modifications<sup>71</sup>. 2 grams of 2-week-old seedling tissue were collected from MORC6-FLAG X  
693 PIAL2-Myc F1 generation and PIAL2-Myc transgenic plants and ground into fine powder in  
694 liquid nitrogen. The tissue powder was resuspended with 10 ml IP buffer, and incubated for 20  
695 min at 4°C. Then the lysate was centrifuged and filtered with Miracloth twice. 30 µL of anti-  
696 FLAG M2 Affinity Gel (Millipore) was added to the supernatant and incubated for 2 hours at  
697 4°C. Then, the anti-FLAG beads were washed with IP buffer for 5 times, and eluted with 40ul

698 elution buffer (IP buffer with 100 ug/ml 3xFLAG peptide). The eluted protein was used for  
699 western blot.

700

#### 701 **Data availability**

702 All high-throughput sequencing data generated in this study are accessible at the National Center  
703 for Biotechnology information Gene Expression Omnibus via series accession GSE221679. (also  
704 weblink here <https://www.ncbi.nlm.nih.gov/geo/query/acc.cgi?acc=GSE221679>).

705

#### 706 **Code availability**

707 The customized code used in this manuscript can be distributed upon request. Requests should be  
708 addressed to S.E.J.

#### 709 **Acknowledgements**

710 We thank Suhua Feng and Mahnaz Akhavan for support with high-throughput sequencing at the  
711 UCLA Broad Stem Cell Research Center BioSequencing Core Facility. This work was supported  
712 by NIH R35 GM130272 to S.E.J. S.E.J is an Investigator of the Howard Hughes Medical  
713 Institute.

#### 714 **Author contributions**

715 Z.L, M.W., Z.Z and S.E.J. designed the research, interpreted the data, and wrote the manuscript;  
716 Z.L, M.W. and Z.Z performed experiments and performed bioinformatic data analysis; Y.J.A.,  
717 and J.W performed IP-MS and interpreted the data. S.B. and J.A.L. contributed to gathering  
mutant

718 materials, construction of transgenic lines, performing initial ZF108 tethering assays and  
719 discussions. J.G.B contributed to PHD1-ZF108 materials. S.F. performed BS-PCR-seq and high  
720 throughput sequencing; X.W provided technical support.

## 721 **Competing interests**

722 The authors declare no competing interests.

723

## 724 **Figure Legends:**

725 **Fig. 1 | The MOM1 complex colocalizes with RdDM sites. a**, Native IP-MS of Col-0 control  
726 and FLAG epitope tagged MOM1, MOM2, PIAL2, PHD1 and AIPP3 transgenic lines. MS/MS  
727 counts from MaxQuant output are listed. **b**, Metaplots and heatmaps representing ChIP-seq  
728 signals of Pol V, MOM1-Myc, PIAL2-Myc, PHD1-FLAG, and AIPP3-FLAG over Pol V peaks  
729 (n=10,868). ChIP-seq signal of control samples were subtracted for plotting. **c**, Screenshots of  
730 Pol V, MOM1-Myc, PIAL2-Myc, AIPP3-FLAG and PHD1-FLAG ChIP-seq signals with control  
731 ChIP-seq signal subtracted and CG, CHG, and CHH DNA methylation level by WGBS over  
732 representative RdDM sites. **d**, Volcano plot showing proteins that have significant interactions  
733 with MOM1 as detected by crosslinking IP-MS, with RdDM pathway components and MOM1  
734 complex components labeled. Crosslinking IP-MS of Col-0 plant tissue was used as control. **e**,  
735 AIPP3-FLAG ChIP-seq peaks were divided into two groups: Group 1 peaks (n = 3075) have  
736 MOM1-Myc ChIP-seq signal enriched and Group 2 peaks (n = 523) have no enrichment of  
737 MOM1-Myc ChIP-seq signal. Metaplots and heatmaps representing ChIP-seq signals of MOM1-



738 Myc, AIPP3-FLAG, PHD1-FLAG and PHD3-FLAG over these two groups of AIPP3 peaks are  
739 shown. ChIP-seq signal of control samples were subtracted for plotting.

740

741 **Fig. 2 | ZF tethering of the MOM1 complex to the *FWA* promoter triggers DNA**

742 **methylation *FWA* silencing. a**, Flowering time of *fwa*, Col-0 and representative T2 lines of

743 MOM1-ZF, MOM2-ZF, PIAL1-ZF, PIAL2-ZF and PHD1-ZF in the *fwa* background. The

744 numbers of independent plants (n) scored for each population are listed in Supplementary Table

745 5. **b**, qRT-PCR showing the relative mRNA level of *FWA* gene in the leaves of *fwa* plants, and

746 four T2 plants of MOM1-ZF, MOM2-ZF, PIAL1-ZF, PIAL2-ZF and PHD1-ZF in the *fwa*

747 background. Bar plots and error bars indicate the mean and standard error of three technical

748 replicates, respectively, with individual technical replicates shown as dots. **c**, CG, CHG, and

749 CHH DNA methylation levels over *FWA* promoter regions measured by BS-PCR-seq in Col-0,

750 *fwa* and representative T2 plants of MOM1-ZF, MOM2-ZF, PIAL1-ZF, PIAL2-ZF and PHD1-

751 ZF in the *fwa* background with (+) or without (-) corresponding transgenes. Pink vertical boxes

752 indicate ZF binding sites. **d**, Metaplots showing relative variations (sample minus control) of

753 CG, CHG, and CHH DNA methylation levels over ZF off-target sites in representative T2 plants

754 of MOM1-ZF, MOM2-ZF, PIAL1-ZF, PIAL2-ZF and PHD1-ZF in the *fwa* background versus

755 *fwa* control plants measured by whole genome bisulfite sequencing (WGBS).

756

757 **Fig. 3 | MOM1-ZF recruits the Pol V arm of the RdDM machinery via MORC6. a**,

758 Flowering time of *fwa*, Col-0, and T1 lines of PIAL2-ZF and MOM1-ZF in the *fwa* mutant

759 backgrounds as well as in backgrounds of *fwa* introgressed mutants, including *nprp1*, *svh2/9*,  
760 *morc6*, *dms3*, *drd1*, *rdm1*, *nrpe1* and *drm1/2*. The numbers of independent plants (n) scored for  
761 each population are listed in Supplementary Table 5. **b**, Metaplots and heatmaps representing  
762 ChIP-seq signals of Pol V and MORC6-Myc over Pol V peaks (n=10,868). ChIP-seq signal of  
763 control samples were subtracted for plotting. **c**, Screenshots of Pol V, MORC6-Myc, MOM1-  
764 Myc and PIAL2-Myc ChIP-seq signals with control ChIP-seq signals subtracted and CG, CHG,  
765 and CHH DNA methylation level by WGBS over a representative RdDM site. **d**, Yeast Two-  
766 Hybrid assay showing *in vitro* direct interactions between PIAL1 and PIAL2 with MORC6 and  
767 the MOM1 CMM2 domain, as well as between PIAL2 and MOM2. **e**, PIAL2 and MORC6 *in*  
768 *vivo* interaction shown by co-immunoprecipitation (Co-IP) in MORC6-FLAG and PIAL2-Myc  
769 crossed lines.

770

771 **Fig. 4 | The MOM1 complex facilitates the process of transgene silencing.** **a**, Flowering time  
772 of *FWA* transgene T1 plants in the Col-0, *nrpe1-11*, *mom1-3*, *pial1/2*, *mom2-2*, *aipp3-1* and  
773 *phd1-2* genetic backgrounds. **b**, Relative *FWA* mRNA level (upper panel) and relative *FWA*  
774 promoter DNA quantity after McrBC treatment (lower panel) of four late-flowering *FWA*  
775 transgene containing T1 plants in the *mom1-3* and *pial1/2* genetic backgrounds. *FWA* transgene  
776 containing T1 plants in the Col-0 and *nrpe1-11* backgrounds were used as controls. Bar plots and  
777 error bars indicate the mean and standard error of three technical replicates, respectively, with  
778 individual technical replicates shown as dots. **c**, Flowering time (leaf number) of *FWA* transgene  
779 T2 plants in the Col-0, *nrpe1-11*, *mom1-3* and *pial1/2* genetic backgrounds. For **a** and **c**, the

780 numbers of independent plants (n) scored for each population are listed in Supplementary Table  
781 5.

782

783 **Fig. 5 | The MOM1 complex influences DNA methylation and chromatin accessibility at**  
784 **some endogenous RdDM sites. a,** Boxplots and heatmaps showing the variation of CG, CHG,  
785 and CHH DNA methylation in *phd1-2*, *aipp3-1*, *mom2-2*, *mom1-3*, *pial1/2*, *morc6-3* and  
786 *morchex* mutants vs Col-0 wild type over hypo CHH hcDMRs of the *morchex* mutant (n=520).  
787 **b,** Heatmap depicting the overlapping enrichment of hypo CHH hcDMRs among *aipp3-1*,  
788 *mom2-2*, *mom1-3*, *pial1/2*, *morc6-3* and *morchex* mutants over *morchex* mutant hypo CHH  
789 hcDMRs (n=520). **c,** Boxplot representing the expression level (RNA-seq signal normalized by  
790 RPKM) of the genomic bins of 1 kb from hypo CHH hcDMRs (n=520) of the *morchex* mutant in  
791 Col-0, *aipp3-1*, *phd1-2*, *pial1-2*, *pial2-1*, *mom2-2*, *mom1-3*, *pial1/2*, *morc6-3* and *morchex*  
792 mutants. **d,** Metaplots and heatmaps representing ATAC-seq signal (*mom1-3* minus Col-0) and  
793 Pol V ChIP-seq signal (subtracting control ChIP-seq signal) over regions with higher ATAC-seq  
794 signals in *mom1-3* (n=342) and shuffled regions. **e,** Screenshots of ATAC-seq signals of Col-0  
795 and *mom1-3*, ChIP-seq signals of MOM1-Myc and Pol V (subtracting control signal) as well as  
796 CG, CHG, and CHH DNA methylation level by WGBS over a representative RdDM site. In box  
797 plots of **a** and **c**, center line represents the median; box limits represent the 25th and 75th  
798 percentiles; whiskers represent the minimum and the maximum.

799

800 **Fig. 6 | MOM1 complex components and MORCs shows genomic distribution patterns**  
801 **distinct from that of the RdDM component Pol V. a**, Metaplots of ChIP-seq signals of Pol V,  
802 PIAL2, MOM1, MORC4, MORC6, and MORC7 over TEs in euchromatic arms (n=16,661) and  
803 TEs in pericentromeric regions (n=14,525), with control ChIP-seq signals subtracted. **b**,  
804 Metaplots and heatmaps of ChIP-seq signals of Pol V, MOM1, PIAL2, MORC4, MORC6,  
805 MORC7, PHD1, and AIPP3 over Cluster 1 and Cluster 2 ChIP-seq peaks of MOM1 and Pol V,  
806 with control ChIP-seq signals subtracted. **c**, Metaplots of ChIP-seq signals of H3K4me3 and  
807 H3PanAC (normalized to H3), as well as ATAC-seq signal of Col-0 over Cluster 1 and Cluster 2  
808 peaks of MOM1 and Pol V. **d**, Metaplots and heatmaps of MOM1 ChIP-seq signal (with control  
809 ChIP-seq signal subtracted), H3K4me3 ChIP-seq signal (normalized to H3) and ATAC-seq  
810 signal of Col-0 plants over genes close to Cluster 2 peaks and shuffled control regions. **e**,  
811 Screenshots of Pol V, MOM1, PIAL2, MORC6 ChIP-seq signals with control ChIP-seq signals  
812 subtracted, H3K4me3 and H3PanAC ChIP-seq signals, ATAC-seq signal of Col-0 plants, as well  
813 as CG, CHG, and CHH DNA methylation level by WGBS over a representative genomic region  
814 containing both Cluster 1 and Cluster 2 ChIP-seq peaks.

815 **Supplementary Fig. 1 | Example of AIPP3 Group1 and Group2 ChIP-seq Peaks.**

816 Screenshots of MOM1-Myc, PHD1-FLAG, AIPP3-FLAG and PHD3-FLAG ChIP-seq signals  
817 over representative AIPP3 Group1 peaks (**a**) and Group2 peaks (**b**), with control ChIP-seq  
818 signals subtracted.

819

820 **Supplementary Fig. 2 | PIAL1-ZF and AIPP3-ZF silence *FWA* less efficiently than ZF**  
821 **tethering of other MOM1 complex components. a**, Flowering time of *fwa*, Col-0, and T1  
822 populations of MOM1-ZF, MOM2-ZF, PIAL1-ZF, PIAL2-ZF and PHD1-ZF in the *fwa*  
823 background. **b**, left panel: qRT-PCR showing the relative mRNA level of *FWA* gene in PIAL1-  
824 ZF T1 plants in *fwa* background. Right panel: qPCR showing the relative *FWA* promoter DNA  
825 quantity after McrBC treatment in PIAL1-ZF T1 plants in *fwa* background. Bar plots and error  
826 bars indicate the mean and standard error of three technical replicates, respectively, with  
827 individual technical replicates shown as dots. **c**, Flowering time of *fwa*, Col-0, and representative  
828 T2 populations of AIPP3-ZF in *fwa* background. For **a** and **c**, the numbers of independent plants  
829 (*n*) scored for each population are listed in Supplementary Table 5. **d**, CG, CHG, and CHH DNA  
830 methylation levels over *FWA* promoter regions measured by BS-PCR-seq in Col-0, *fwa* and  
831 representative T2 plants of AIPP3-ZF with (+) or without (-) transgenes in the *fwa* background.  
832 Pink vertical boxes indicate ZF binding sites.

833

834 **Supplementary Fig. 3 | ZF tethering of MOM1 complex components and miniMOM1 lead**  
835 **to DNA methylation. a**, Screenshots of Whole Genome Bisulfite Sequencing (WGBS) showing  
836 CG, CHG, and CHH DNA methylation level over a representative ZF off-target site in *fwa*, and  
837 representative T2 plants of MOM1-ZF, MOM2-ZF, PIAL1-ZF, PIAL2-ZF and PHD1-ZF in the  
838 *fwa* background. **b**, Flowering time of miniMOM1-ZF T1 plants in the *fwa* background (upper  
839 panel) and representative T2 lines (lower panel). The numbers of independent plants (*n*) scored  
840 for each population are listed in Supplementary Table 5. **c**, CG, CHG, and CHH DNA  
841 methylation levels over *FWA* promoter regions measured by BS-PCR-seq in Col-0, *fwa*, and

842 representative mini-MOM1-ZF T2 plants with (+) or without (-) miniMOM1-ZF transgenes in  
843 the *fwa* background. Pink vertical boxes indicated ZF binding sites.

844

845 **Supplementary Fig. 4 | Analysis of ZF tethering of MOM1 complex components and**

846 **MORC6 in mutant backgrounds. a**, Flowering time of MOM1-ZF T1 plants in the

847 backgrounds of *fwa* introgressed into *aipp3-1*, *phd1-2*, *mom2-1* and *pial1/2* mutants; Flowering

848 time of PHD1-ZF T1 plants in the backgrounds of *fwa* introgressed into *aipp3-1*, *mom1-3* and

849 *pial1/2* mutants. **b**, Flowering time of PIAL2-ZF T1 plants in the backgrounds of *fwa*

850 introgressed into *aipp3-1*, *phd1-2*, *mom1-3* and *mom2-1*; Flowering time of MOM2-ZF T1 plants

851 in the backgrounds of *fwa* introgressed into *aipp3-1*, *phd1-2*, *mom1-3* and *pial1/2*. **c**, Flowering

852 time of *fwa* introgressed into *mom1-3*, *pial1/2* and *aipp3* plants, with Col-0 and *fwa* plants as

853 controls. **d**, Flowering time of MOM2-ZF and PIAL1-ZF T1 plants in the background of *fwa*

854 introgressed into *mom6-3*; Flowering time of MORC6-ZF T1 plants in the backgrounds of *fwa*

855 introgressed into *mom1-3*, *mom2-1*, *pial1/2*, *phd1-2* and *aipp3-1*. The numbers of independent

856 plants (n) scored for each population are listed in Supplementary Table 5.

857

858 **Supplementary Fig. 5 | Flowering time of FWA transgene T1 plants in MOM1 complex**

859 **component mutant backgrounds. a**, Comparison of the flowering time of T1 plant populations

860 with *FWA* transgenes in the Col-0, *nrpe1-11*, MOM1 complex component mutant backgrounds.

861 One-way ANOVA followed by Dunnett's multiple comparison tests were used for statistical

862 analysis. **b**, Flowering time of Col-0, *nrpe1-11*, *mom1-3*, *pial1/2*, *mom2-2*, *aipp3-1* and *phd1-2*

863 plants. The numbers of independent plants (n) scored for each population are listed in  
864 Supplementary Table 5.

865

866 **Supplementary Fig. 6 | RNA-seq analysis of the mutants of MOM1 complex components. a,**

867 Dotplots showing the differentially expressed TEs (compared to Col-0 control) over the five  
868 *Arabidopsis* chromosomes in the *nrpe1-11*, *mom1-2*, *mom1-3*, *pial1/2*, *morc6-3*, *morchex*, *aipp3-*  
869 *2*, *aipp3-1*, *pial1-2*, *pial2-1*, *mom2-1*, *mom2-2*, *phd1-2* and *phd1-4* mutant backgrounds. Red and  
870 blue dots indicate upregulated and down regulated TEs in mutants compared to Col-0 control,  
871 respectively. The positions of pericentromeric heterochromatin regions of each chromosome are  
872 annotated at the bottom of each plot. **b,** Heatmap showing the expression level of differentially  
873 expressed TEs (DE TEs, n=423) in three replicates of *mom1-2*, *mom1-3*, *pial1/2*, *morc6-3*,  
874 *morchex*, *aipp3-1*, *aipp3-2*, *pial1-2*, *pial2-1*, *mom2-1*, *mom2-2*, *phd1-2* and *phd1-4* mutant plants  
875 versus Col-0 plants. Expression level of these TEs in *nrpe1-11* mutant and corresponding Col-0  
876 control plants are also plotted for comparison.

877

878 **References**

- 879 1. Law, J. A. & Jacobsen, S. E. Establishing, maintaining and modifying DNA methylation  
880 patterns in plants and animals. *Nat. Rev. Genet.* **11**, 204–220 (2010).
- 881 2. Slotkin, R. K. & Martienssen, R. Transposable elements and the epigenetic regulation of  
882 the genome. *Nat. Rev. Genet.* **8**, 272–285 (2007).

- 883 3. Amedeo, P., Habu, Y., Afsar, K., Mittelsten Scheid, O. & Paszkowski, J. Disruption of the  
884 plant gene MOM releases transcriptional silencing of methylated genes. *Nature* **405**, 203–  
885 206 (2000).
- 886 4. Numa, H. *et al.* Transduction of RNA-directed DNA methylation signals to repressive  
887 histone marks in *Arabidopsis thaliana*. *EMBO J.* **29**, 352–362 (2010).
- 888 5. Han, Y.-F. *et al.* The SUMO E3 Ligase-Like Proteins PIAL1 and PIAL2 Interact with  
889 MOM1 and Form a Novel Complex Required for Transcriptional Silencing. *Plant Cell* **28**,  
890 1215–1229 (2016).
- 891 6. Yokthongwattana, C. *et al.* MOM1 and Pol-IV/V interactions regulate the intensity and  
892 specificity of transcriptional gene silencing. *EMBO J.* **29**, 340–351 (2010).
- 893 7. Moissiard, G. *et al.* Transcriptional gene silencing by *Arabidopsis* microorchidia  
894 homologues involves the formation of heteromers. *Proc. Natl. Acad. Sci. U. S. A.* **111**,  
895 7474–7479 (2014).
- 896 8. Zhang, Y. *et al.* Large-scale comparative epigenomics reveals hierarchical regulation of  
897 non-CG methylation in *Arabidopsis*. *Proc. Natl. Acad. Sci. U. S. A.* **115**, E1069–E1074  
898 (2018).
- 899 9. Feng, S. *et al.* Genome-wide Hi-C analyses in wild-type and mutants reveal high-  
900 resolution chromatin interactions in *Arabidopsis*. *Mol. Cell* **55**, 694–707 (2014).
- 901 10. Mittelsten Scheid, O., Probst, A. V, Afsar, K. & Paszkowski, J. Two regulatory levels of  
902 transcriptional gene silencing in *Arabidopsis*. *Proc. Natl. Acad. Sci. U. S. A.* **99**, 13659–



- 903 13662 (2002).
- 904 11. Probst, A. V, Fransz, P. F., Paszkowski, J. & Mittelsten Scheid, O. Two means of  
905 transcriptional reactivation within heterochromatin. *Plant J.* **33**, 743–749 (2003).
- 906 12. Caikovski, M. *et al.* Divergent evolution of CHD3 proteins resulted in MOM1 refining  
907 epigenetic control in vascular plants. *PLoS Genet.* **4**, e1000165 (2008).
- 908 13. Nishimura, T. *et al.* Structural basis of transcriptional gene silencing mediated by  
909 Arabidopsis MOM1. *PLoS Genet.* **8**, e1002484 (2012).
- 910 14. Zhao, Q.-Y. & He, X.-J. Exploring potential roles for the interaction of MOM1 with  
911 SUMO and the SUMO E3 ligase-like protein PIAL2 in transcriptional silencing. *PLoS*  
912 *One* **13**, e0202137 (2018).
- 913 15. Chan, S. W.-L. *et al.* RNA silencing genes control de novo DNA methylation. *Science*  
914 **303**, 1336 (2004).
- 915 16. Matzke, M. A. & Mosher, R. A. RNA-directed DNA methylation: an epigenetic pathway  
916 of increasing complexity. *Nat. Rev. Genet.* **15**, 394–408 (2014).
- 917 17. Matzke, M. A., Kanno, T. & Matzke, A. J. M. RNA-Directed DNA Methylation: The  
918 Evolution of a Complex Epigenetic Pathway in Flowering Plants. *Annu. Rev. Plant Biol.*  
919 **66**, 243–267 (2015).
- 920 18. Wendte, J. M. & Pikaard, C. S. The RNAs of RNA-directed DNA methylation. *Biochim.*  
921 *Biophys. acta. Gene Regul. Mech.* **1860**, 140–148 (2017).
- 922 19. Law, J. A., Vashisht, A. A., Wohlschlegel, J. A. & Jacobsen, S. E. SHH1, a homeodomain

- 923 protein required for DNA methylation, as well as RDR2, RDM4, and chromatin  
924 remodeling factors, associate with RNA polymerase IV. *PLoS Genet.* **7**, e1002195 (2011).
- 925 20. Zhou, M., Palanca, A. M. S. & Law, J. A. Locus-specific control of the de novo DNA  
926 methylation pathway in Arabidopsis by the CLASSY family. *Nat. Genet.* **50**, 865–873  
927 (2018).
- 928 21. Blevins, T. *et al.* Identification of Pol IV and RDR2-dependent precursors of 24 nt  
929 siRNAs guiding de novo DNA methylation in Arabidopsis. *Elife* **4**, e09591 (2015).
- 930 22. Zhai, J. *et al.* A One Precursor One siRNA Model for Pol IV-Dependent siRNA  
931 Biogenesis. *Cell* **163**, 445–455 (2015).
- 932 23. Henderson, I. R. *et al.* Dissecting Arabidopsis thaliana DICER function in small RNA  
933 processing, gene silencing and DNA methylation patterning. *Nat. Genet.* **38**, 721–725  
934 (2006).
- 935 24. Stroud, H., Greenberg, M. V. C., Feng, S., Bernatavichute, Y. V. & Jacobsen, S. E.  
936 Comprehensive analysis of silencing mutants reveals complex regulation of the  
937 Arabidopsis methylome. *Cell* **152**, 352–364 (2013).
- 938 25. Lahmy, S. *et al.* Evidence for ARGONAUTE4-DNA interactions in RNA-directed DNA  
939 methylation in plants. *Genes Dev.* **30**, 2565–2570 (2016).
- 940 26. McCue, A. D. *et al.* ARGONAUTE 6 bridges transposable element mRNA-derived  
941 siRNAs to the establishment of DNA methylation. *EMBO J.* **34**, 20–35 (2015).
- 942 27. Olmedo-Monfil, V. *et al.* Control of female gamete formation by a small RNA pathway in

- 943 Arabidopsis. *Nature* **464**, 628–632 (2010).
- 944 28. Johnson, L. M. *et al.* SRA-and SET-domain-containing proteins link RNA polymerase v  
945 occupancy to DNA methylation. *Nature* **507**, 124–128 (2014).
- 946 29. Johnson, L. M., Law, J. A., Khattar, A., Henderson, I. R. & Jacobsen, S. E. SRA-domain  
947 proteins required for DRM2-mediated de novo DNA methylation. *PLoS Genet.* **4**,  
948 e1000280 (2008).
- 949 30. Liu, Z.-W. *et al.* The SET domain proteins SUVH2 and SUVH9 are required for Pol V  
950 occupancy at RNA-directed DNA methylation loci. *PLoS Genet.* **10**, e1003948 (2014).
- 951 31. Wongpalee, S. P. *et al.* CryoEM structures of Arabidopsis DDR complexes involved in  
952 RNA-directed DNA methylation. *Nat. Commun.* **10**, 3916 (2019).
- 953 32. Wierzbicki, A. T., Haag, J. R. & Pikaard, C. S. Noncoding Transcription by RNA  
954 Polymerase Pol IVb/Pol V Mediates Transcriptional Silencing of Overlapping and  
955 Adjacent Genes. *Cell* **135**, 635–648 (2008).
- 956 33. Wierzbicki, A. T., Ream, T. S., Haag, J. R. & Pikaard, C. S. RNA polymerase V  
957 transcription guides ARGONAUTE4 to chromatin. *Nat. Genet.* **41**, 630–634 (2009).
- 958 34. Liu, W. *et al.* RNA-directed DNA methylation involves co-transcriptional small-RNA-  
959 guided slicing of polymerase V transcripts in Arabidopsis. *Nat. plants* **4**, 181–188 (2018).
- 960 35. Zhong, X. *et al.* Molecular mechanism of action of plant DRM de novo DNA  
961 methyltransferases. *Cell* **157**, 1050–1060 (2014).
- 962 36. Moissiard, G. *et al.* MORC family ATPases required for heterochromatin condensation

- 963 and gene silencing. *Science* **336**, 1448–1451 (2012).
- 964 37. Jing, Y. *et al.* SUVH2 and SUVH9 Couple Two Essential Steps for Transcriptional Gene  
965 Silencing in Arabidopsis. *Mol. Plant* **9**, 1156–1167 (2016).
- 966 38. Liu, Z.-W. *et al.* Two Components of the RNA-Directed DNA Methylation Pathway  
967 Associate with MORC6 and Silence Loci Targeted by MORC6 in Arabidopsis. *PLoS*  
968 *Genet.* **12**, e1006026 (2016).
- 969 39. Harris, C. J. *et al.* Arabidopsis AtMORC4 and AtMORC7 Form Nuclear Bodies and  
970 Repress a Large Number of Protein-Coding Genes. *PLoS Genet.* **12**, e1005998 (2016).
- 971 40. Xue, Y. *et al.* Arabidopsis MORC proteins function in the efficient establishment of RNA  
972 directed DNA methylation. *Nat. Commun.* **12**, 4292 (2021).
- 973 41. Kinoshita, T. *et al.* One-way control of FWA imprinting in Arabidopsis endosperm by  
974 DNA methylation. *Science* **303**, 521–523 (2004).
- 975 42. Soppe, W. J. J. *et al.* The late flowering phenotype of *fwa* mutants is caused by gain-of-  
976 function epigenetic alleles of a homeodomain gene. *Mol. Cell* **6**, 791–802 (2000).
- 977 43. Gallego-Bartolomé, J. *et al.* Co-targeting RNA Polymerases IV and V Promotes Efficient  
978 De Novo DNA Methylation in Arabidopsis. *Cell* **176**, 1068-1082.e19 (2019).
- 979 44. Qian, F. *et al.* A histone H3K27me3 reader cooperates with a family of PHD finger-  
980 containing proteins to regulate flowering time in Arabidopsis. *J. Integr. Plant Biol.* **63**,  
981 787–802 (2021).
- 982 45. Duan, C.-G. *et al.* A protein complex regulates RNA processing of intronic

- 983 heterochromatin-containing genes in Arabidopsis. *Proc. Natl. Acad. Sci. U. S. A.* **114**,  
984 E7377–E7384 (2017).
- 985 46. Zhang, Y.-Z. *et al.* Coupling of H3K27me3 recognition with transcriptional repression  
986 through the BAH-PHD-CPL2 complex in Arabidopsis. *Nat. Commun.* **11**, 6212 (2020).
- 987 47. Moissiard, G. *et al.* Transcriptional gene silencing by Arabidopsis microorchidia  
988 homologues involves the formation of heteromers. *Proc. Natl. Acad. Sci. U. S. A.* **111**,  
989 7474–7479 (2014).
- 990 48. Greenberg, M. V. C. *et al.* Identification of genes required for de novo DNA methylation  
991 in Arabidopsis. *Epigenetics* **6**, 344–354 (2011).
- 992 49. Habu, Y. *et al.* Epigenetic regulation of transcription in intermediate heterochromatin.  
993 *EMBO Rep.* **7**, 1279–1284 (2006).
- 994 50. Huettel, B. *et al.* Endogenous targets of RNA-directed DNA methylation and Pol IV in  
995 Arabidopsis. *EMBO J.* **25**, 2828–2836 (2006).
- 996 51. Liu, Q. *et al.* The characterization of Mediator 12 and 13 as conditional positive gene  
997 regulators in Arabidopsis. *Nat. Commun.* **11**, 2798 (2020).
- 998 52. Zhong, Z. *et al.* MORC proteins regulate transcription factor binding by mediating  
999 chromatin compaction in active chromatin regions. *bioRxiv* 2022.11.01.514783 (2022)  
1000 doi:10.1101/2022.11.01.514783.
- 1001 53. Yan, L. *et al.* High-Efficiency Genome Editing in Arabidopsis Using YAO Promoter-  
1002 Driven CRISPR/Cas9 System. *Mol. Plant* **8**, 1820–1823 (2015).

- 1003 54. Gao, Z. *et al.* An RNA polymerase II- and AGO4-associated protein acts in RNA-directed  
1004 DNA methylation. *Nature* **465**, 106–109 (2010).
- 1005 55. Kanno, T. *et al.* Involvement of putative SNF2 chromatin remodeling protein DRD1 in  
1006 RNA-directed DNA methylation. *Curr. Biol.* **14**, 801–805 (2004).
- 1007 56. Zhou, R., Benavente, L. M., Stepanova, A. N. & Alonso, J. M. A recombineering-based  
1008 gene tagging system for Arabidopsis. *Plant J.* **66**, 712–723 (2011).
- 1009 57. Ritchie, M. E. *et al.* limma powers differential expression analyses for RNA-sequencing  
1010 and microarray studies. *Nucleic Acids Res.* **43**, e47 (2015).
- 1011 58. Langmead, B. & Salzberg, S. L. Fast gapped-read alignment with Bowtie 2. *Nat. Methods*  
1012 **9**, 357–359 (2012).
- 1013 59. Li, H. *et al.* The Sequence Alignment/Map format and SAMtools. *Bioinformatics* **25**,  
1014 2078–2079 (2009).
- 1015 60. Ramírez, F. *et al.* deepTools2: a next generation web server for deep-sequencing data  
1016 analysis. *Nucleic Acids Res.* **44**, W160-5 (2016).
- 1017 61. Zhang, Y. *et al.* Model-based analysis of ChIP-Seq (MACS). *Genome Biol.* **9**, R137  
1018 (2008).
- 1019 62. Wilkerson, M. D. & Hayes, D. N. ConsensusClusterPlus: a class discovery tool with  
1020 confidence assessments and item tracking. *Bioinformatics* **26**, 1572–1573 (2010).
- 1021 63. Bourguet, P. *et al.* The histone variant H2A.W and linker histone H1 co-regulate  
1022 heterochromatin accessibility and DNA methylation. *Nat. Commun.* **12**, 2683 (2021).

- 1023 64. Li, B. & Dewey, C. N. RSEM: accurate transcript quantification from RNA-Seq data with  
1024 or without a reference genome. *BMC Bioinformatics* **12**, 323 (2011).
- 1025 65. Grabherr, M. G. *et al.* Full-length transcriptome assembly from RNA-Seq data without a  
1026 reference genome. *Nat. Biotechnol.* **29**, 644–652 (2011).
- 1027 66. Xi, Y. & Li, W. BSMAP: whole genome bisulfite sequence MAPping program. *BMC*  
1028 *Bioinformatics* **10**, 232 (2009).
- 1029 67. Heinz, S. *et al.* Simple combinations of lineage-determining transcription factors prime  
1030 cis-regulatory elements required for macrophage and B cell identities. *Mol. Cell* **38**, 576–  
1031 589 (2010).
- 1032 68. Buenrostro, J. D., Giresi, P. G., Zaba, L. C., Chang, H. Y. & Greenleaf, W. J.  
1033 Transposition of native chromatin for fast and sensitive epigenomic profiling of open  
1034 chromatin, DNA-binding proteins and nucleosome position. *Nat. Methods* **10**, 1213–1218  
1035 (2013).
- 1036 69. Zhong, Z. *et al.* DNA methylation-linked chromatin accessibility affects genomic  
1037 architecture in Arabidopsis. *Proc. Natl. Acad. Sci. U. S. A.* **118**, (2021).
- 1038 70. Robinson, M. D., McCarthy, D. J. & Smyth, G. K. edgeR: a Bioconductor package for  
1039 differential expression analysis of digital gene expression data. *Bioinformatics* **26**, 139–  
1040 140 (2010).
- 1041 71. Wang, Q. *et al.* Photoactivation and inactivation of Arabidopsis cryptochrome 2. *Science*  
1042 **354**, 343–347 (2016).

1043



**a**

| Gene      | Protein | Col-0 |      | MOM1-FLAG |      | MOM2-FLAG |      |      | PIAL2-FLAG |      |      | PHD1-FLAG |      | AIPP3-FLAG |      |
|-----------|---------|-------|------|-----------|------|-----------|------|------|------------|------|------|-----------|------|------------|------|
|           |         | Rep1  | Rep2 | Rep1      | Rep2 | Rep1      | Rep2 | Rep3 | Rep1       | Rep2 | Rep3 | Rep1      | Rep2 | Rep1       | Rep2 |
| AT1G08060 | MOM1    | 0     | 1    | 607       | 789  | 51        | 317  | 204  | 244        | 204  | 225  | 158       | 135  | 124        | 121  |
| AT2G28240 | MOM2    | 0     | 0    | 76        | 80   | 53        | 529  | 912  | 62         | 38   | 48   | 9         | 2    | 3          | 1    |
| AT1G08910 | PIAL1   | 0     | 0    | 21        | 31   | 3         | 29   | 13   | 10         | 4    | 2    | 3         | 1    | 4          | 2    |
| AT5G41580 | PIAL2   | 1     | 3    | 146       | 162  | 21        | 137  | 102  | 241        | 263  | 328  | 21        | 12   | 15         | 13   |
| AT1G43770 | PHD1    | 0     | 0    | 24        | 40   | 0         | 44   | 22   | 34         | 31   | 29   | 190       | 145  | 62         | 65   |
| AT4G11560 | AIPP3   | 0     | 0    | 68        | 87   | 10        | 105  | 43   | 95         | 52   | 75   | 224       | 143  | 1412       | 1313 |
| AT5G01270 | CPL2    | 0     | 0    | 0         | 0    | 0         | 0    | 0    | 0          | 0    | 0    | 0         | 0    | 16         | 15   |
| AT5G16680 | PHD2    | 0     | 0    | 0         | 0    | 0         | 0    | 0    | 0          | 0    | 0    | 0         | 0    | 212        | 214  |
| AT3G02890 | PHD3    | 0     | 0    | 0         | 0    | 0         | 0    | 0    | 0          | 0    | 0    | 0         | 0    | 126        | 145  |

**b**

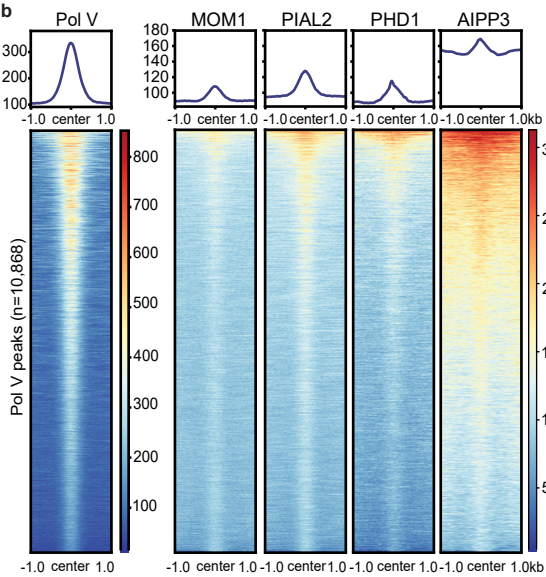

**c**

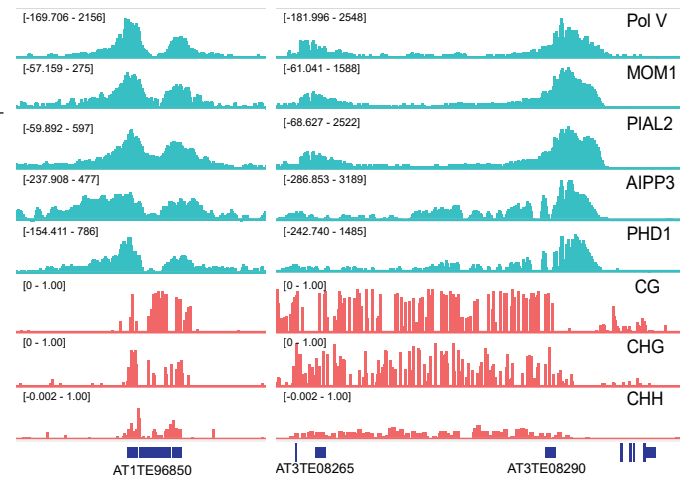

**d**

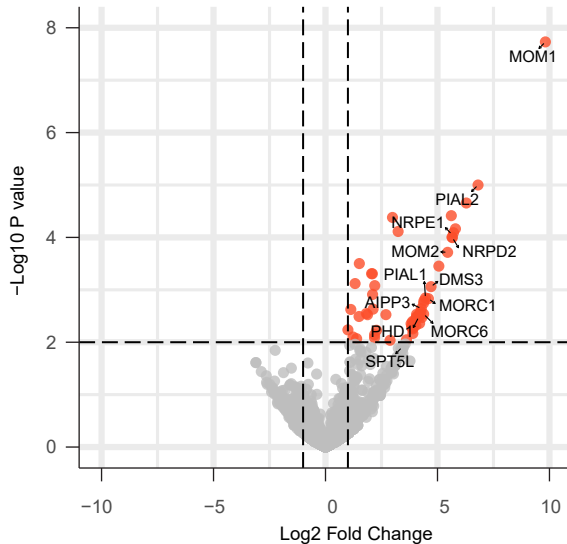

**e**

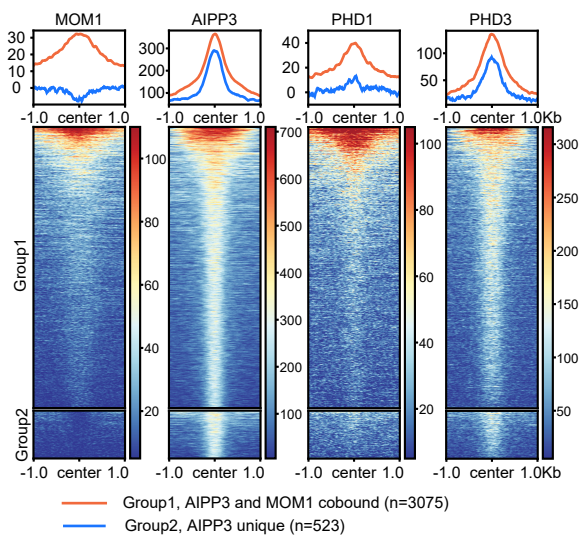

**Fig. 1 | The MOM1 complex colocalizes with RdDM sites.** **a**, Native IP-MS of Col-0 control and FLAG epitope tagged MOM1, MOM2, PIAL2, PHD1 and AIPP3 transgenic lines. MS/MS counts from MaxQuant output are listed. **b**, Metaplots and heatmaps representing ChIP-seq signals of Pol V, MOM1-Myc, PIAL2-Myc, PHD1-FLAG, and AIPP3-FLAG over Pol V peaks ( $n=10,868$ ). ChIP-seq signal of control samples were subtracted for plotting. **c**, Screenshots of Pol V, MOM1-Myc, PIAL2-Myc, AIPP3-FLAG and PHD1-FLAG ChIP-seq signals with control ChIP-seq signal subtracted and CG, CHG, and CHH DNA methylation level by WGBS over representative RdDM sites. **d**, Volcano plot showing proteins that have significant interactions with MOM1 as detected by crosslinking IP-MS, with RdDM pathway components and MOM1 complex components labeled. Crosslinking IP-MS of Col-0 plant tissue was used as control. **e**, AIPP3-FLAG ChIP-seq peaks were divided into two groups: Group 1 peaks ( $n = 3075$ ) have MOM1-Myc ChIP-seq signal enriched and Group 2 peaks ( $n = 523$ ) have no enrichment of MOM1-Myc ChIP-seq signal. Metaplots and heatmaps representing ChIP-seq signals of MOM1-Myc, AIPP3-FLAG, PHD1-FLAG and PHD3-FLAG over these two groups of AIPP3 peaks are shown. ChIP-seq signal of control samples were subtracted for plotting.

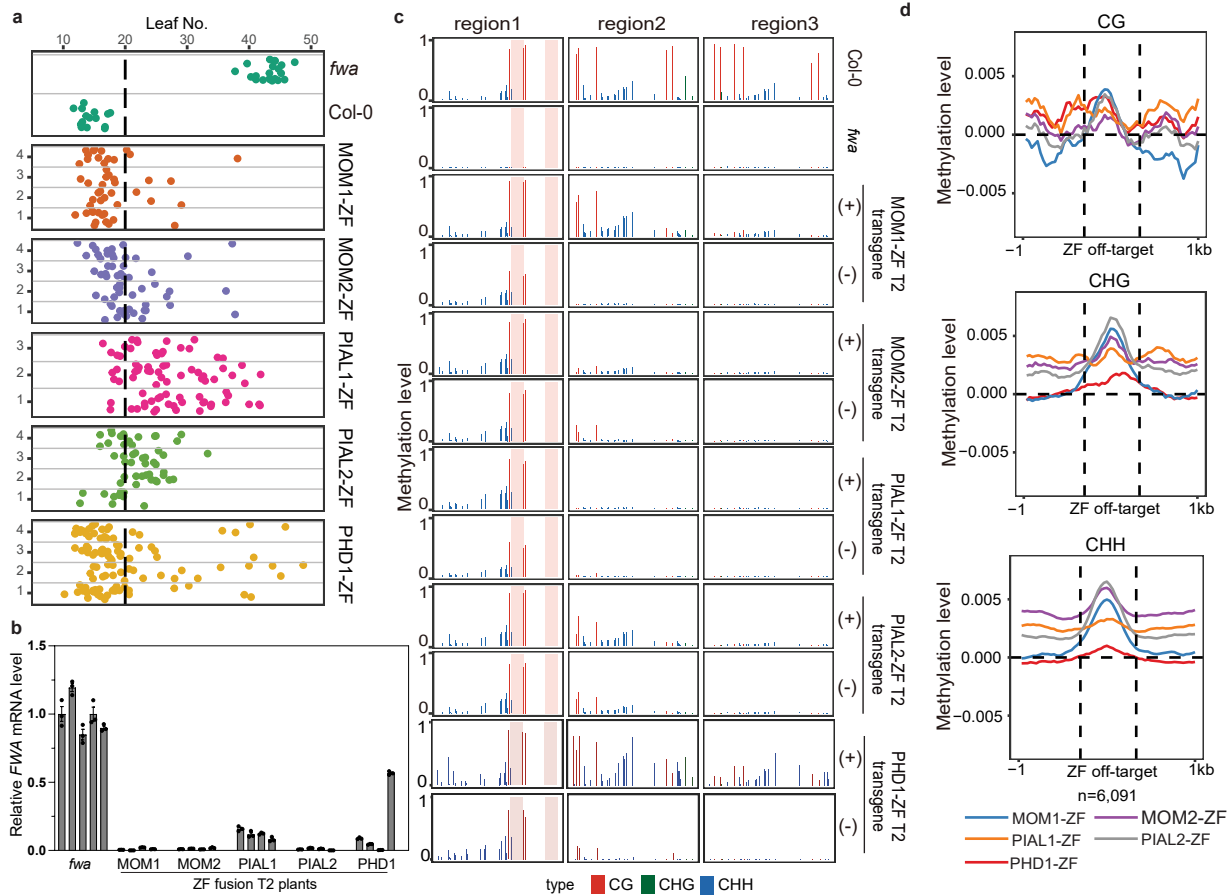

**Fig. 2 | ZF tethering of the MOM1 complex to the FWA promoter triggers DNA methylation FWA silencing.** **a**, Flowering time of *fwa*, Col-0 and representative T2 lines of MOM1-ZF, MOM2-ZF, PIAL1-ZF, PIAL2-ZF and PHD1-ZF in the *fwa* background. The numbers of independent plants (n) scored for each population are listed in Supplementary Table 5. **b**, qRT-PCR showing the relative mRNA level of *FWA* gene in the leaves of *fwa* plants, and four T2 plants of MOM1-ZF, MOM2-ZF, PIAL1-ZF, PIAL2-ZF and PHD1-ZF in the *fwa* background. Bar plots and error bars indicate the mean and standard error of three technical replicates, respectively, with individual technical replicates shown as dots. **c**, CG, CHG, and CHH DNA methylation levels over *FWA* promoter regions measured by BS-PCR-seq in Col-0, *fwa* and representative T2 plants of MOM1-ZF, MOM2-ZF, PIAL1-ZF, PIAL2-ZF and PHD1-ZF in the *fwa* background with (+) or without (-) corresponding transgenes. Pink vertical boxes indicate ZF binding sites. **d**, Metaplots showing relative variations (sample minus control) of CG, CHG, and CHH DNA methylation levels over ZF off-target sites in representative T2 plants of MOM1-ZF, MOM2-ZF, PIAL1-ZF, PIAL2-ZF and PHD1-ZF in the *fwa* background versus *fwa* control plants measured by whole genome bisulfite sequencing (WGBS).

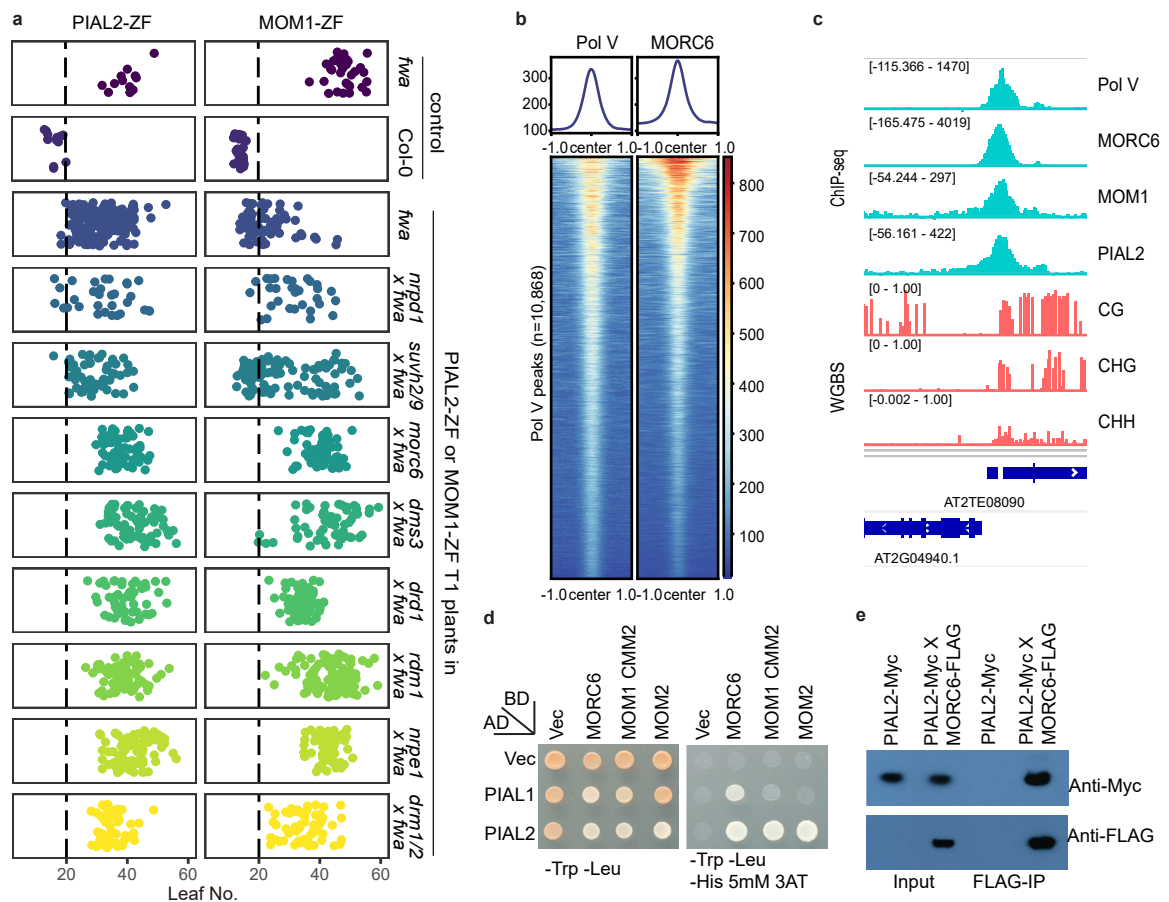

**Fig. 3 | MOM1-ZF recruits the Pol V arm of the RdDM machinery via MORC6.** **a**, Flowering time of *fwa*, *Col-0*, and T1 lines of PIAL2-ZF and MOM1-ZF in the *fwa* mutant backgrounds as well as in backgrounds of *fwa* introgressed mutants, including *nrpd1*, *svuh2/9*, *morc6*, *dms3*, *drd1*, *rdm1*, *nrpe1* and *drm1/2*. The numbers of independent plants (n) scored for each population are listed in Supplementary Table 5. **b**, Metaplots and heatmaps representing ChIP-seq signals of Pol V and MORC6-Myc over Pol V peaks (n=10,868). ChIP-seq signal of control samples were subtracted for plotting. **c**, Screenshots of Pol V, MORC6-Myc, MOM1-Myc and PIAL2-Myc ChIP-seq signals with control ChIP-seq signals subtracted and CG, CHG, and CHH DNA methylation level by WGBS over a representative RdDM site. **d**, Yeast Two-Hybrid assay showing in vitro direct interactions between PIAL1 and PIAL2 with MORC6 and the MOM1 CMM2 domain, as well as between PIAL2 and MOM2. **e**, PIAL2 and MORC6 in vivo interaction shown by co-immunoprecipitation (Co-IP) in MORC6-FLAG and PIAL2-Myc crossed lines.

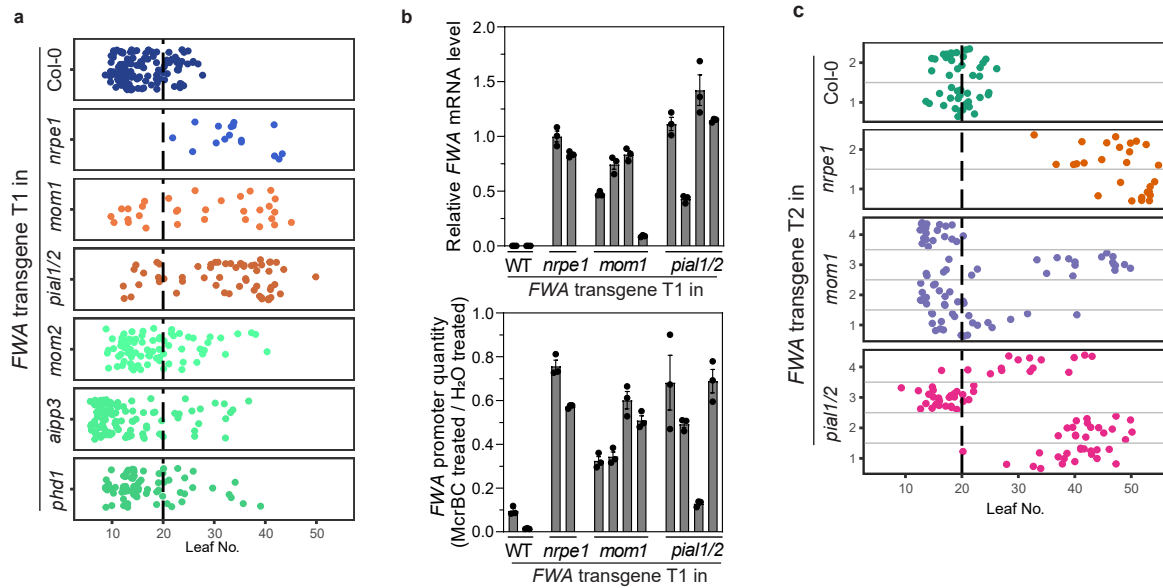

**Fig. 4 | The MOM1 complex facilitates the process of transgene silencing.** **a**, Flowering time of *FWA* transgene T1 plants in the Col-0, *nrpe1-11*, *mom1-3*, *pia1/2*, *mom2-2*, *aipp3-1* and *phd1-2* genetic backgrounds. **b**, Relative *FWA* mRNA level (upper panel) and relative *FWA* promoter DNA quantity after McrBC treatment (lower panel) of four late-flowering *FWA* transgene containing T1 plants in the *mom1-3* and *pia1/2* genetic backgrounds. *FWA* transgene containing T1 plants in the Col-0 and *nrpe1-11* backgrounds were used as controls. Bar plots and error bars indicate the mean and standard error of three technical replicates, respectively, with individual technical replicates shown as dots. **c**, Flowering time (leaf number) of *FWA* transgene T2 plants in the Col-0, *nrpe1-11*, *mom1-3* and *pia1/2* genetic backgrounds. For **a** and **c**, the numbers of independent plants (*n*) scored for each population are listed in Supplementary Table 5.

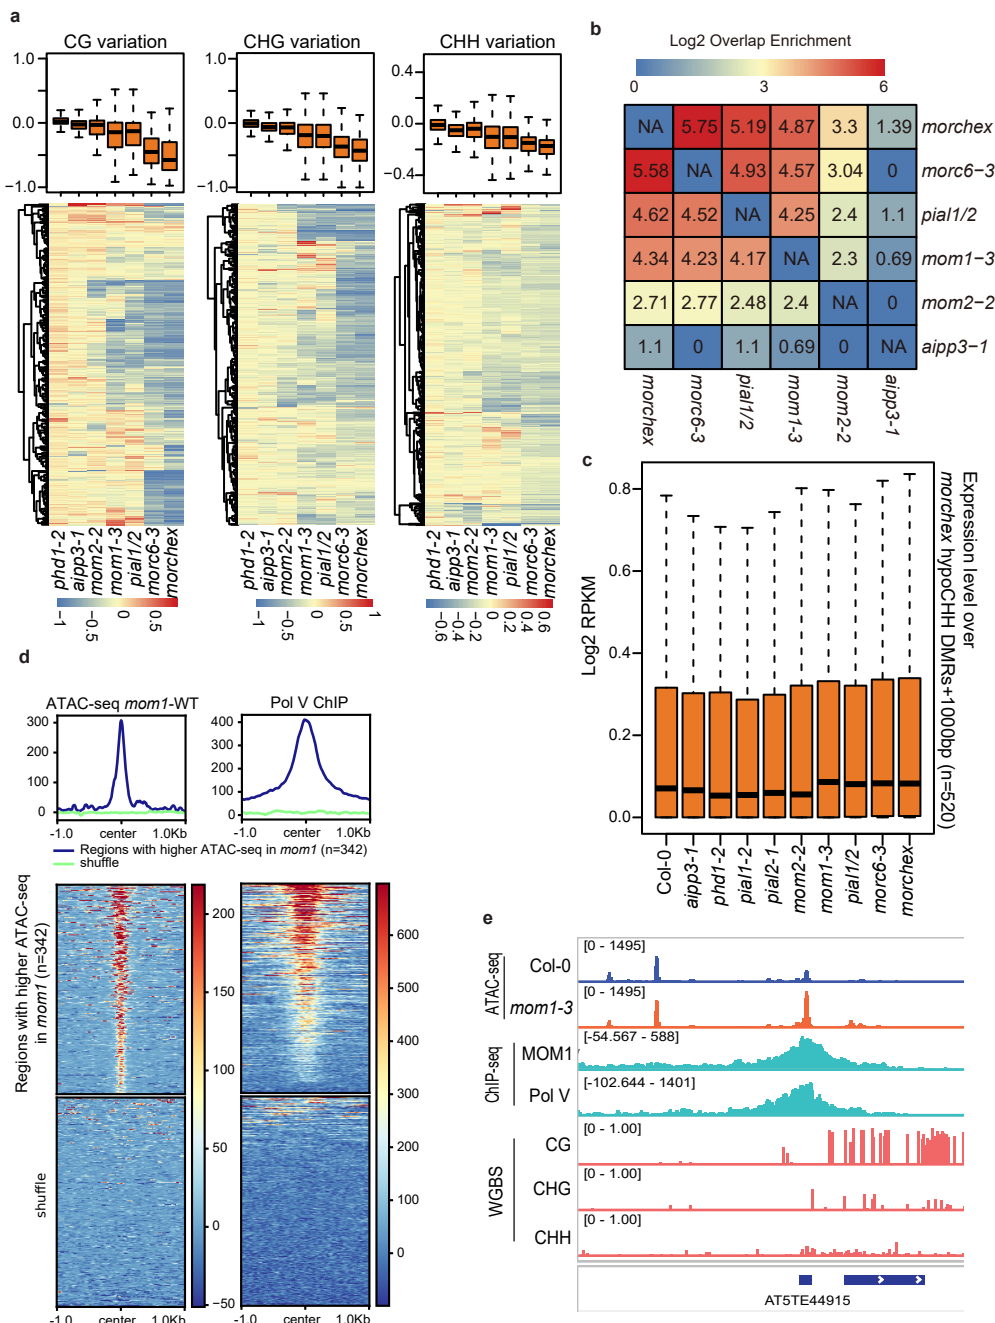

**Fig. 5 | The MOM1 complex influences DNA methylation and chromatin accessibility at some endogenous RdDM sites.** **a**, Boxplots and heatmaps showing the variation of CG, CHG, and CHH DNA methylation in *phd1-2*, *aipp3-1*, *mom2-2*, *mom1-3*, *pial1/2*, *morc6-3* and *morchex* mutants vs Col-0 wild type over hypo CHH hcDMRs of the *morchex* mutant (n=520). **b**, Heatmap depicting the overlapping enrichment of hypo CHH hcDMRs among *aipp3-1*, *mom2-2*, *mom1-3*, *pial1/2*, *morc6-3* and *morchex* mutants over *morchex* mutant hypo CHH hcDMRs (n=520). **c**, Boxplot representing the expression level (RNA-seq signal normalized by RPKM) of the genomic bins of 1 kb from hypo CHH hcDMRs (n=520) of the *morchex* mutant in *Col-0*, *aipp3-1*, *phd1-2*, *pial1-2*, *pial2-1*, *mom2-2*, *mom1-3*, *pial1/2*, *morc6-3* and *morchex* mutants. **d**, Metaplots and heatmaps representing ATAC-seq signal (*mom1-3* minus Col-0) and Pol V ChIP-seq signal (subtracting control ChIP-seq signal) over regions with higher ATAC-seq signals in *mom1-3* (n=342) and shuffled regions. **e**, Screenshots of ATAC-seq signals of Col-0 and *mom1-3*, ChIP-seq signals of MOM1-Myc and Pol V (subtracting control signal) as well as CG, CHG, and CHH DNA methylation level by WGBS over a representative RdDM site. In box plots of **a** and **c**, center line represents the median; box limits represent the 25th and 75th percentiles; whiskers represent the minimum and the maximum.

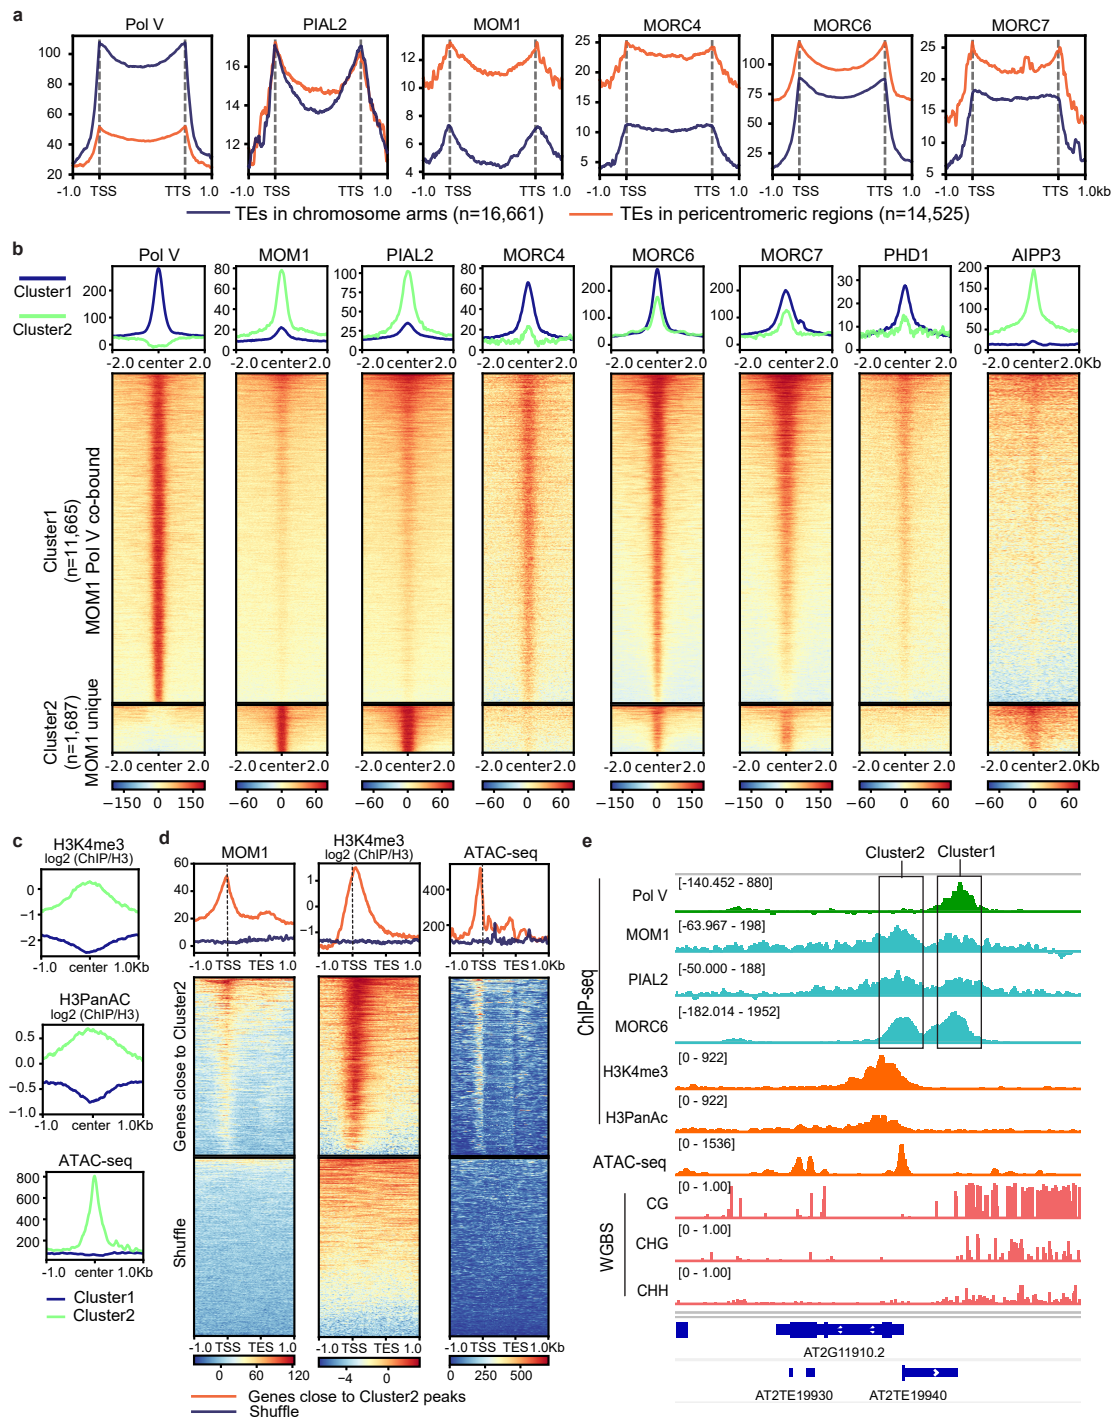

**Fig. 6 | MOM1 complex components and MORCs shows genomic distribution patterns distinct from that of the RdDM component Pol V.**

**a**, Metaplots of ChIP-seq signals of Pol V, PIAL2, MOM1, MORC4, MORC6, and MORC7 over TEs in euchromatic arms (n=16,661) and TEs in pericentromeric regions (n=14,525), with control ChIP-seq signals subtracted. **b**, Metaplots and heatmaps of ChIP-seq signals of Pol V, MOM1, PIAL2, MORC4, MORC6, MORC7, PHD1, and AIPP3 over Cluster 1 and Cluster 2 ChIP-seq peaks of MOM1 and Pol V, with control ChIP-seq signals subtracted. **c**, Metaplots of ChIP-seq signals of H3K4me3 and H3PanAC (normalized to H3), as well as ATAC-seq signal of Col-0 over Cluster 1 and Cluster 2 peaks of MOM1 and Pol V. **d**, Metaplots and heatmaps of MOM1 ChIP-seq signal (with control ChIP-seq signal subtracted), H3K4me3 ChIP-seq signal (normalized to H3) and ATAC-seq signal of Col-0 plants over genes close to Cluster 2 peaks and shuffled control regions. **e**, Screenshots of Pol V, MOM1, PIAL2, MORC6 ChIP-seq signals with control ChIP-seq signals subtracted, H3K4me3 and H3PanAC ChIP-seq signals, ATAC-seq signal of Col-0 plants, as well as CG, CHG, and CHH DNA methylation level by WGBS over a representative genomic region containing both Cluster 1 and Cluster 2 ChIP-seq peaks.
